# Supplementary material for: Synthesis of Novel Baicalein Amino Acid Derivatives and Biological Evaluation as Neuroprotective Agents
Source: MDPI journal article supplement (doi:10.3390/molecules24203647), 2019-10-09

## Supplementary Material

Figure S6:  $^1\text{H}$  NMR,  $^{13}\text{C}$  NMR, and HR-MS spectra of compound **1-15**.

Compound **1**

$^1\text{H}$  NMR spectra of Compound **1**

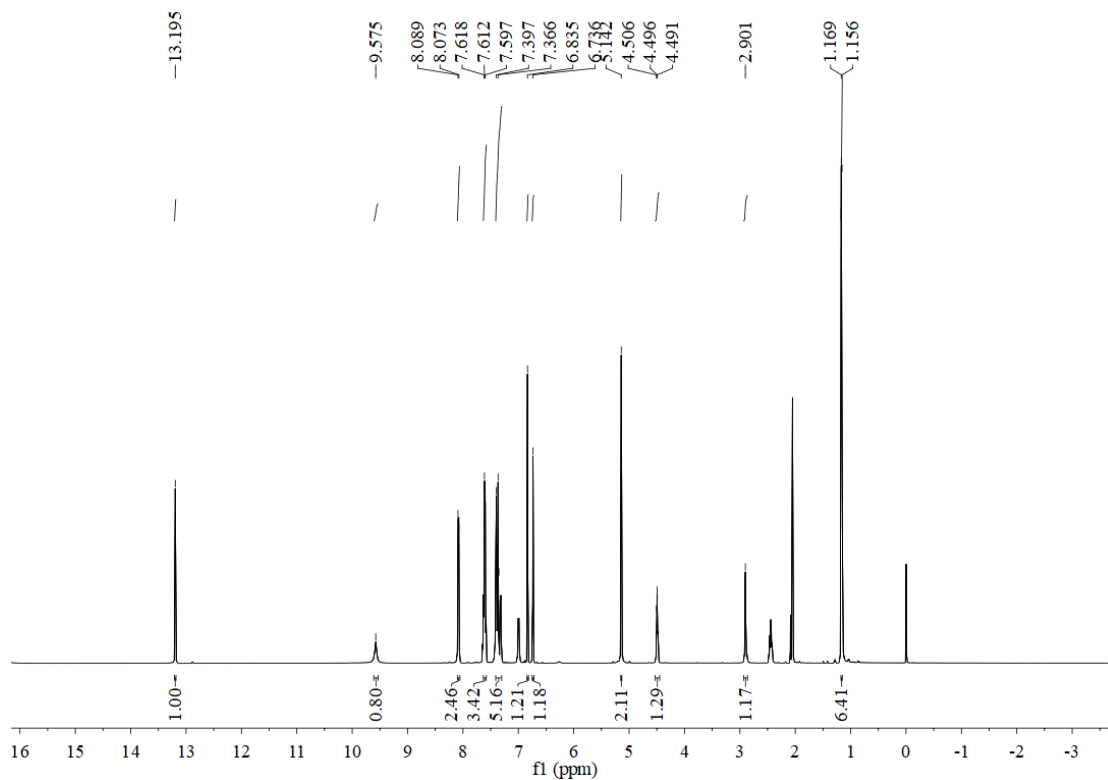

<sup>13</sup>C NMR spectra of Compound 1

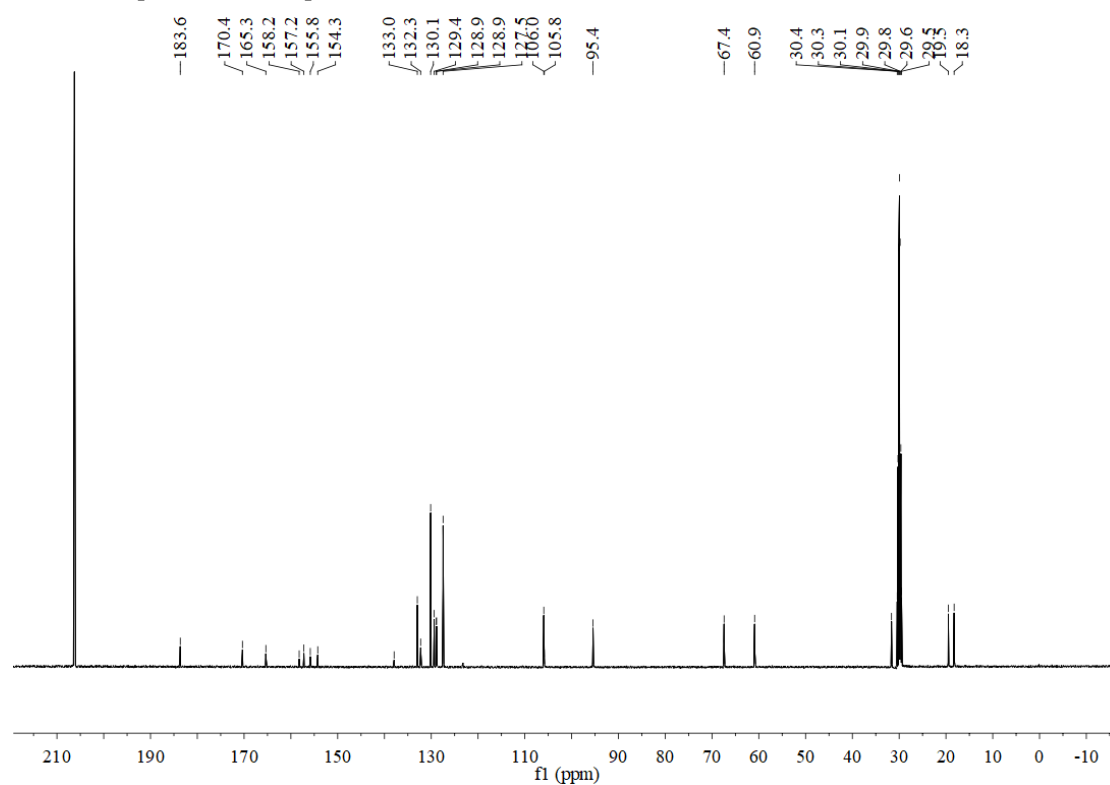

HR-MS of Compound 1

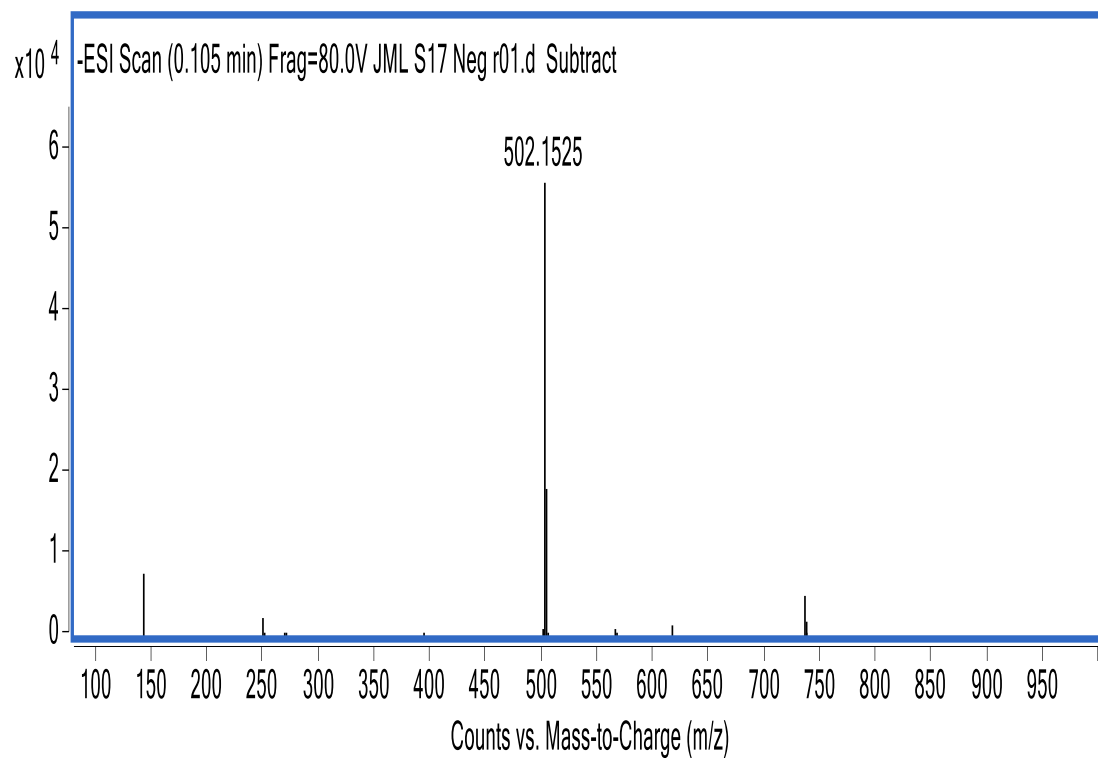

# Compound 2

## <sup>1</sup>H NMR spectra of Compound 2

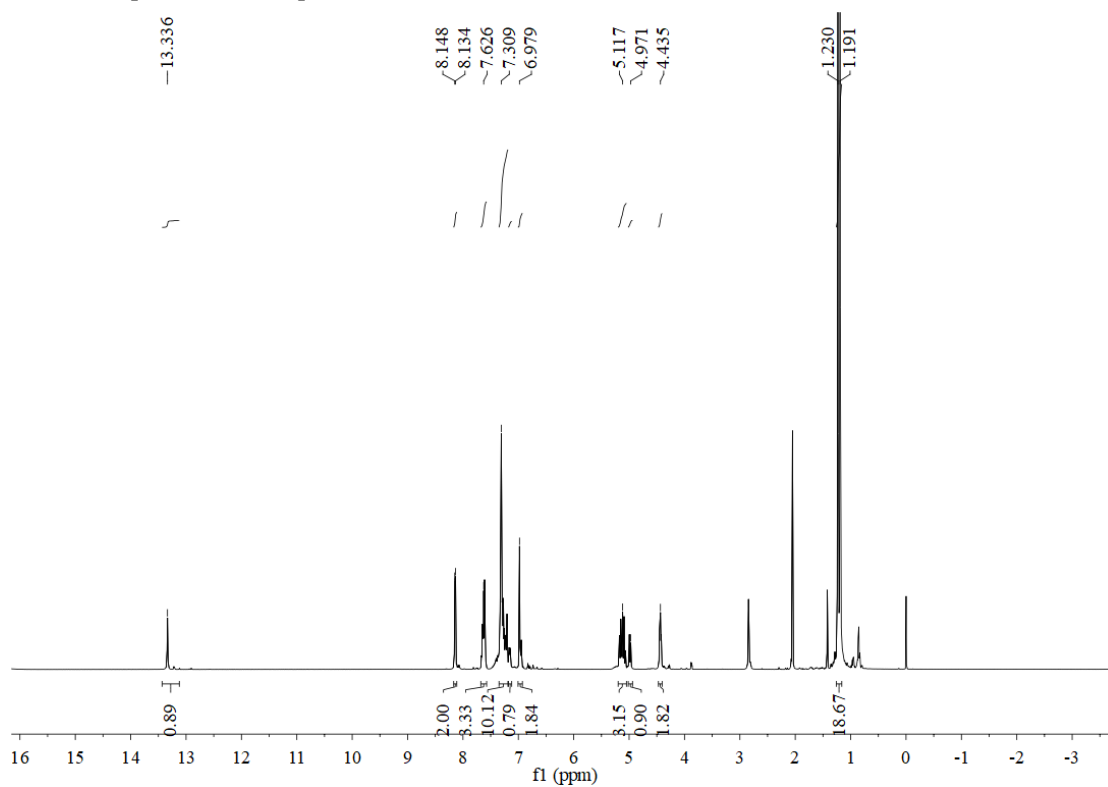

## <sup>13</sup>C NMR spectra of Compound 2

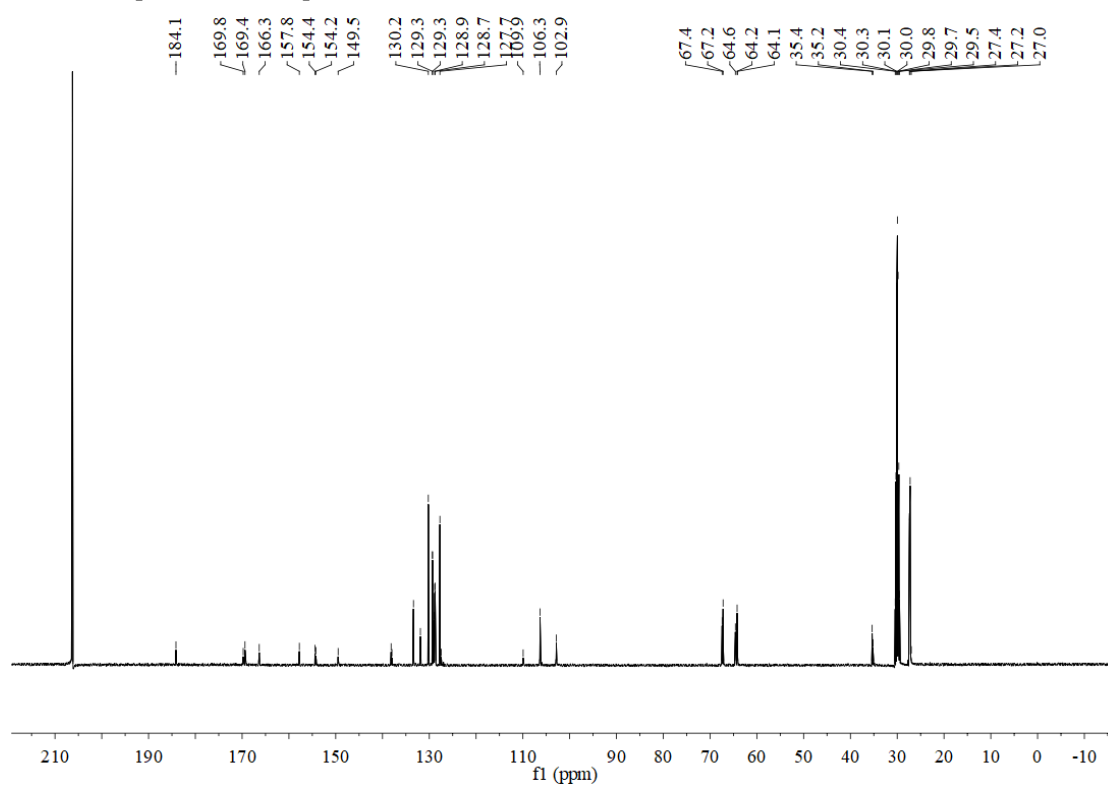

# HR-MS of Compound 2

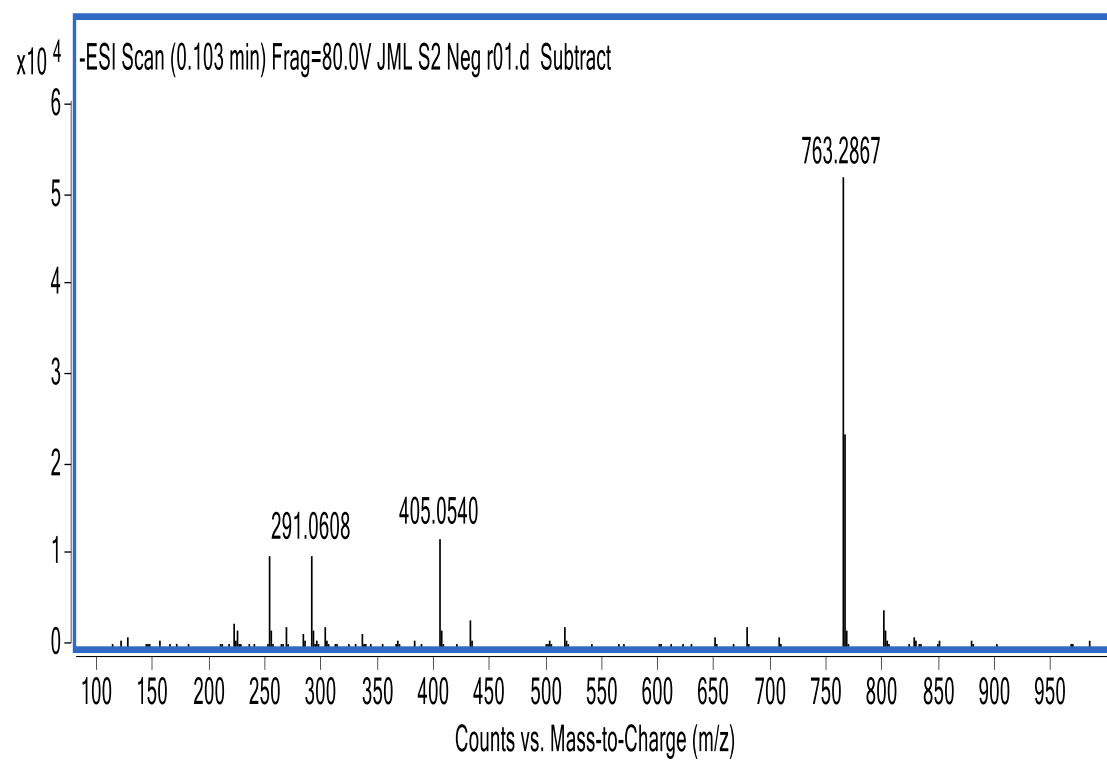

# Compound 3

## <sup>1</sup>H NMR spectra of Compound 3

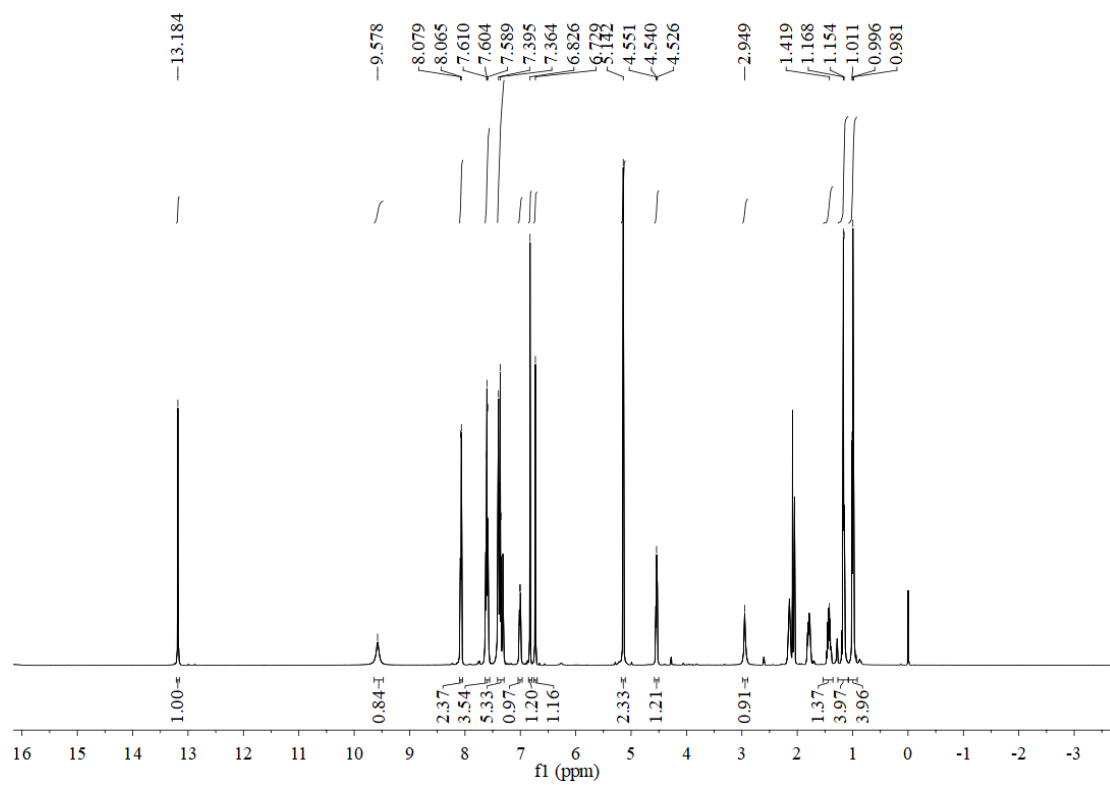

<sup>13</sup>C NMR spectra of Compound 3

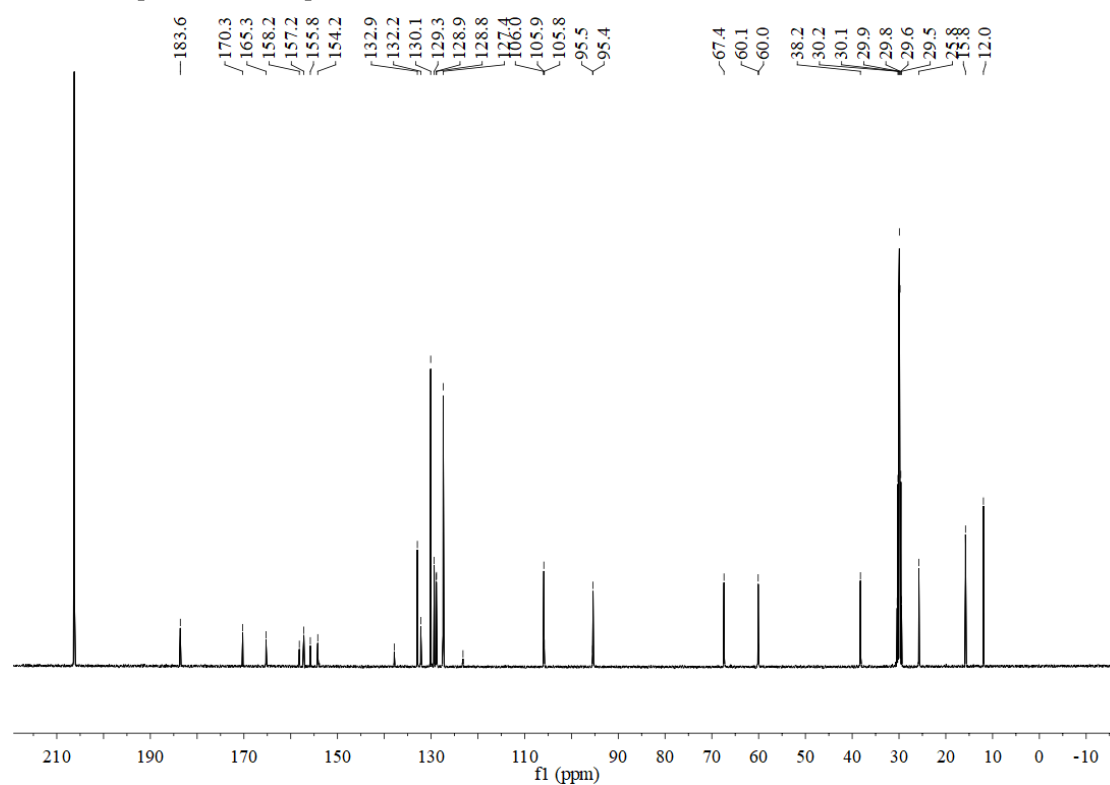

HR-MS of Compound 3

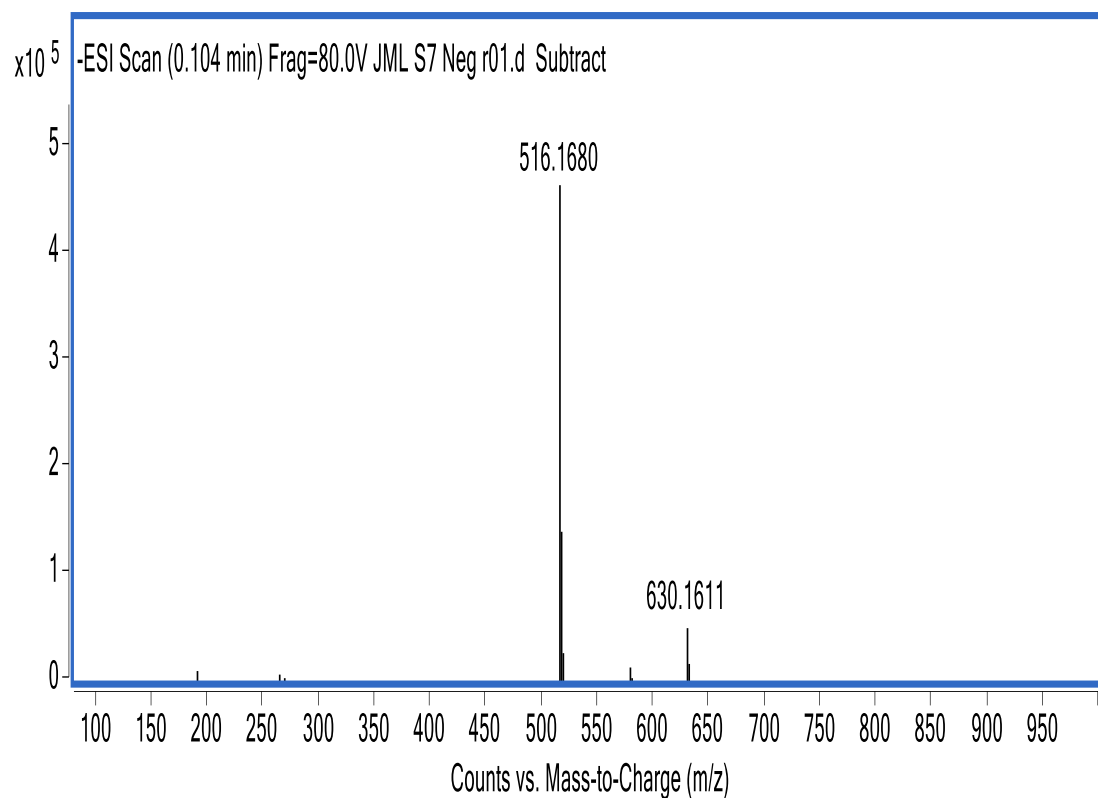

# Compound 4

## <sup>1</sup>H NMR spectra of Compound 4

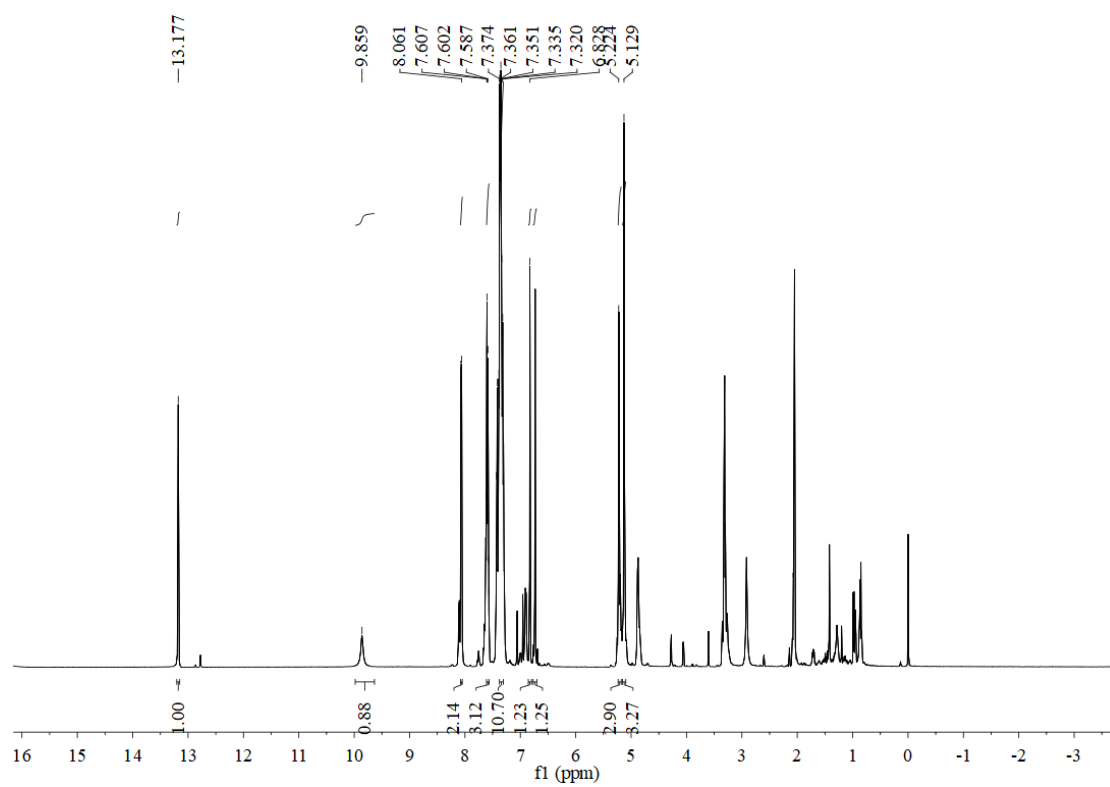

<sup>13</sup>C NMR spectra of Compound 4

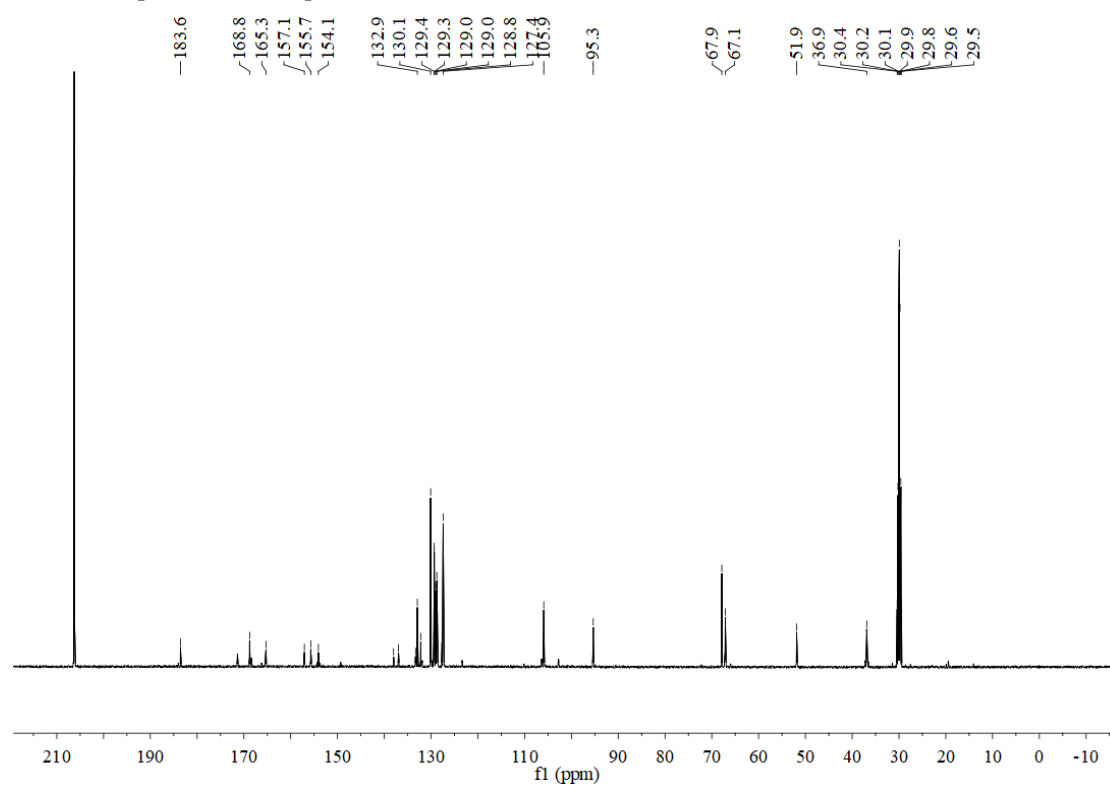

HR-MS of Compound 4

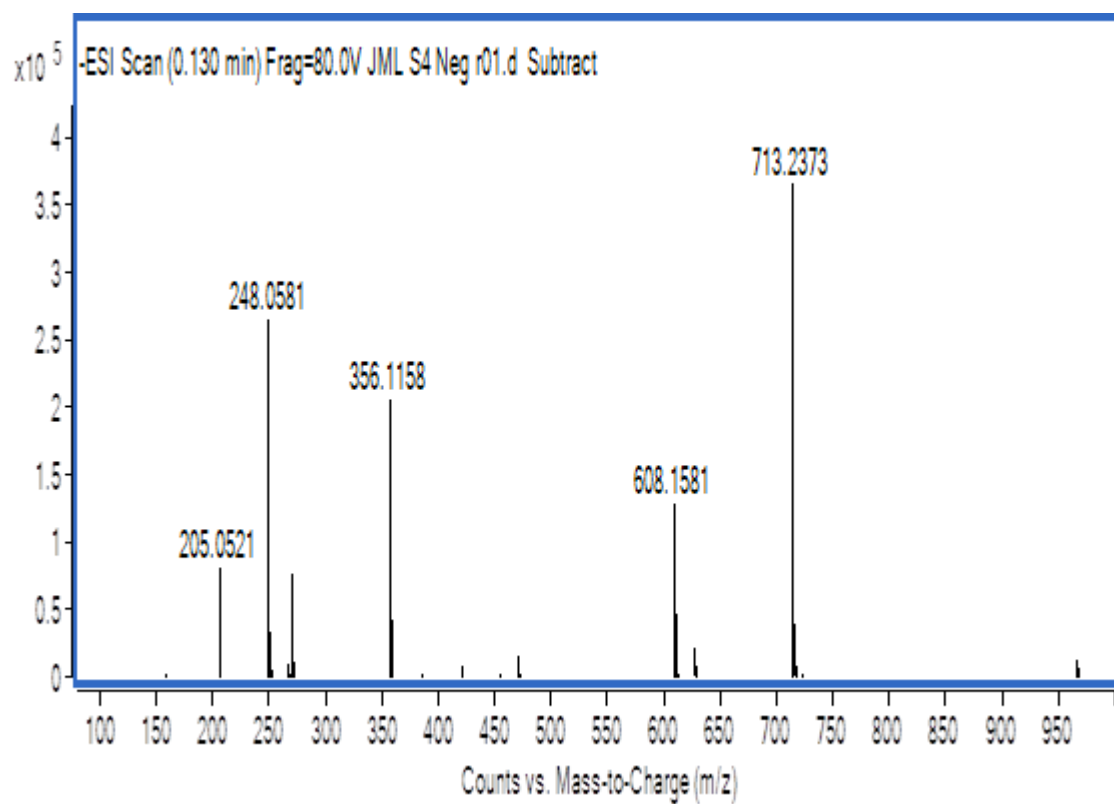



# Compound 5

## <sup>1</sup>H NMR spectra of Compound 5

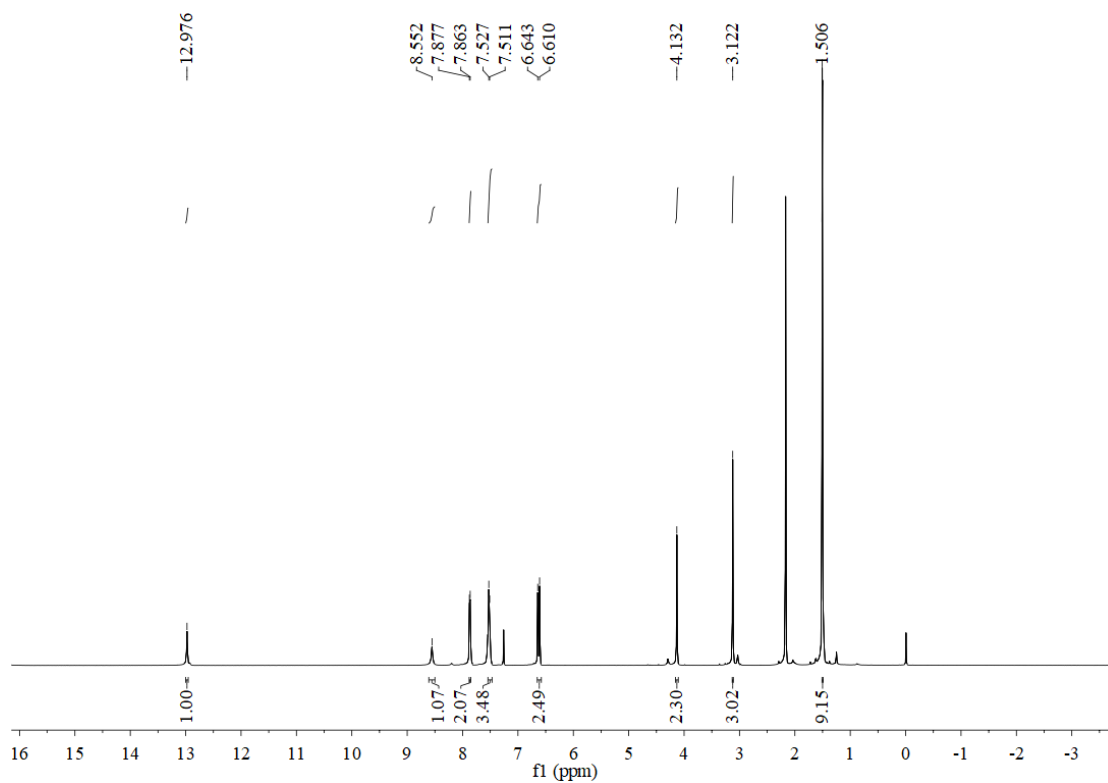

## <sup>13</sup>C NMR spectra of Compound 5

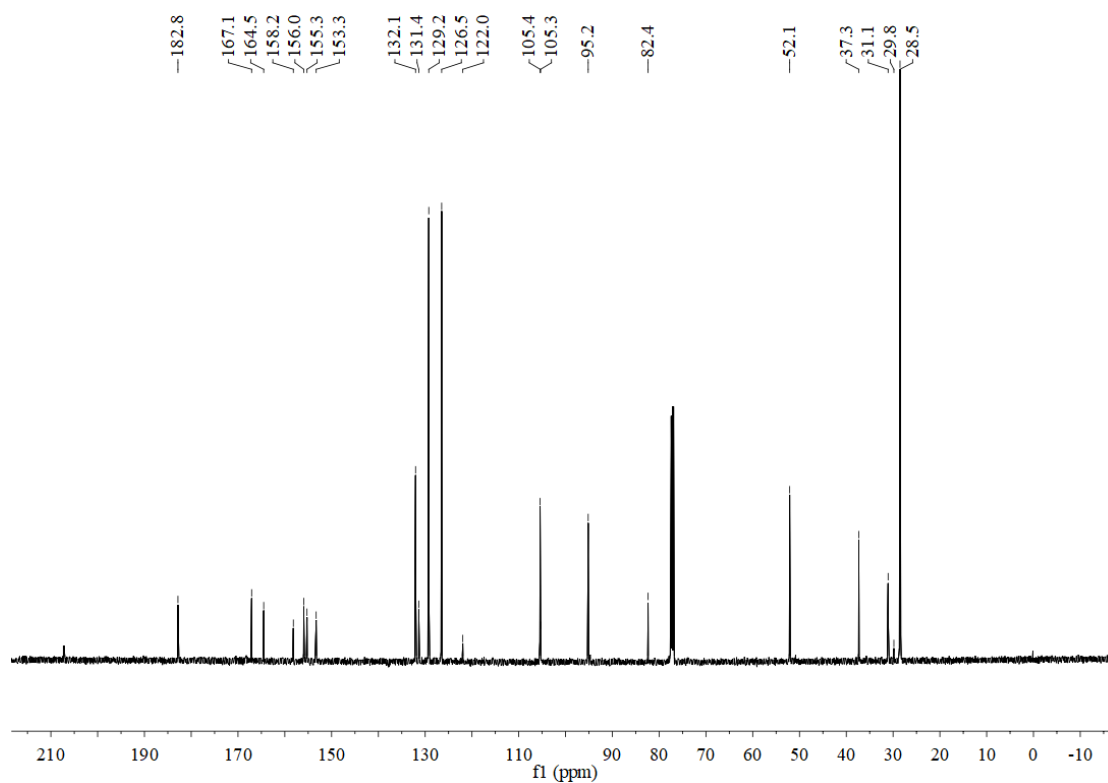

# HR-MS of Compound 5

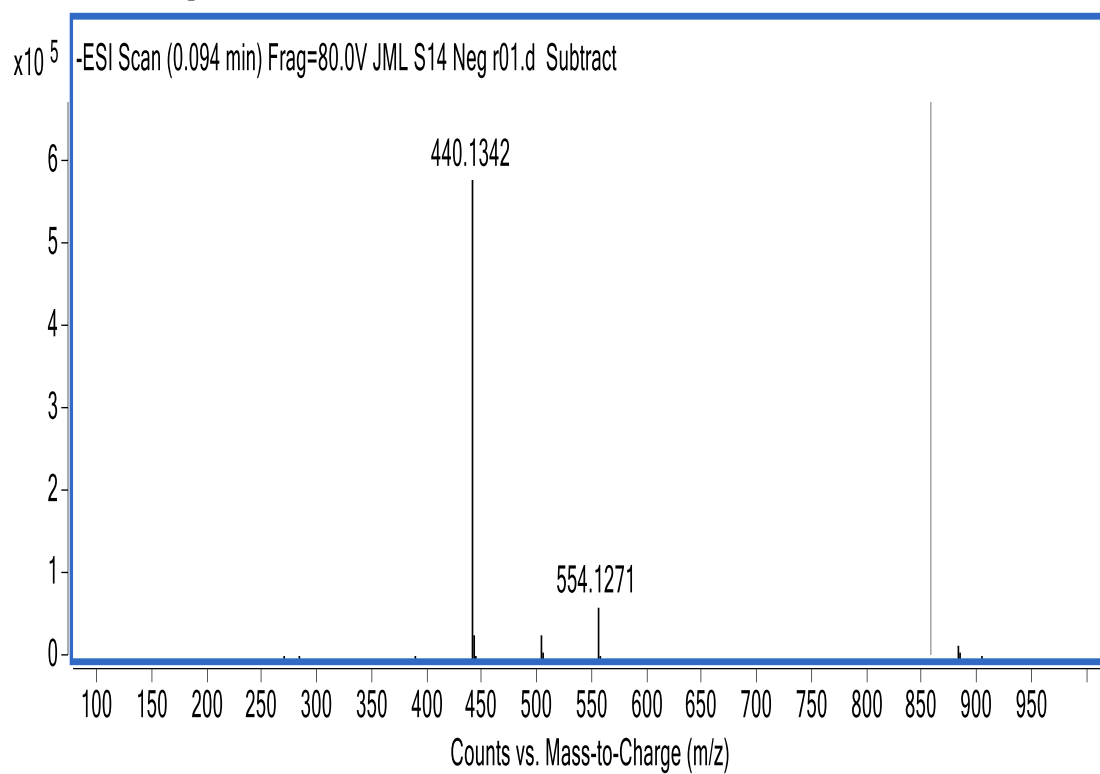

## Compound 6

### <sup>1</sup>H NMR spectra of Compound 6

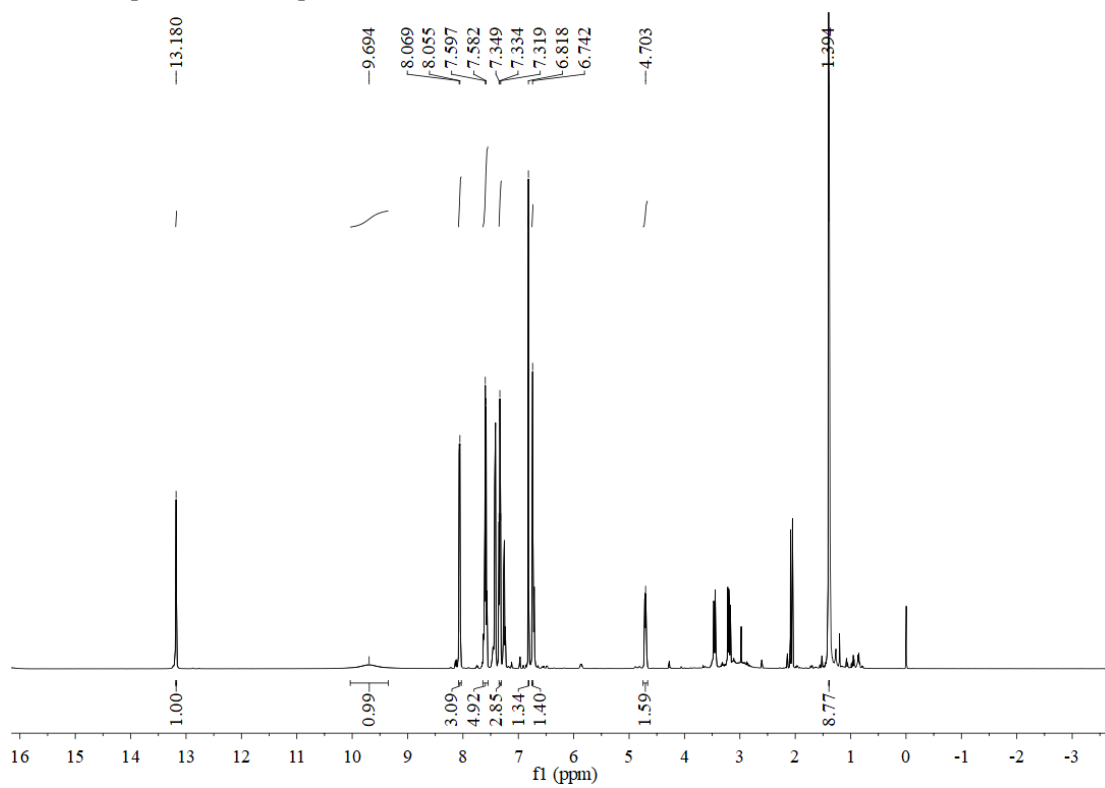

<sup>13</sup>C NMR spectra of Compound 6

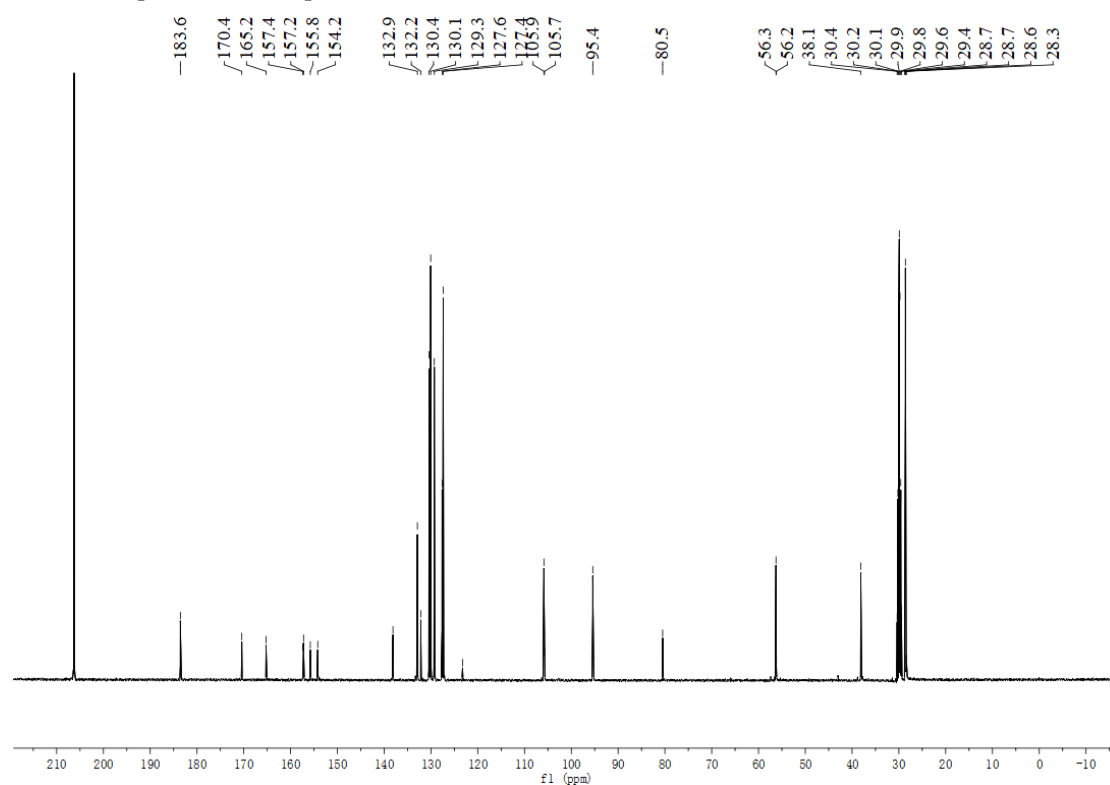

HR-MS of Compound 6

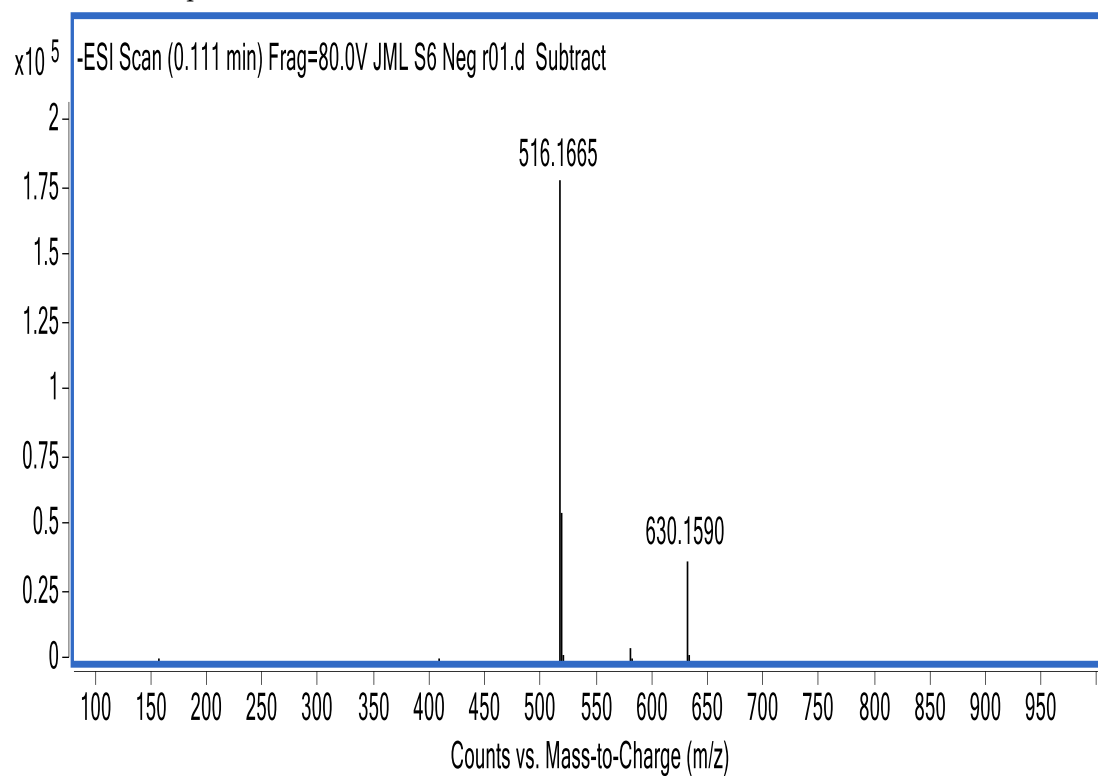

# Compound 7

## <sup>1</sup>H NMR spectra of Compound 7

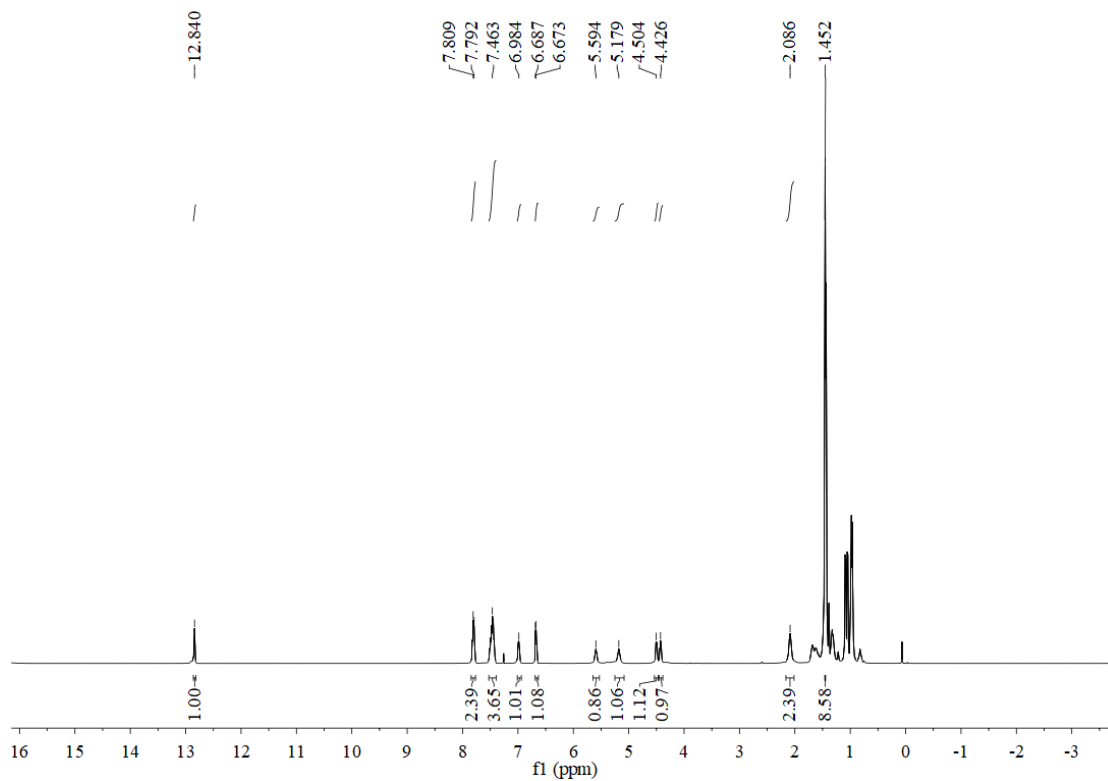

## <sup>13</sup>C NMR spectra of compound 7

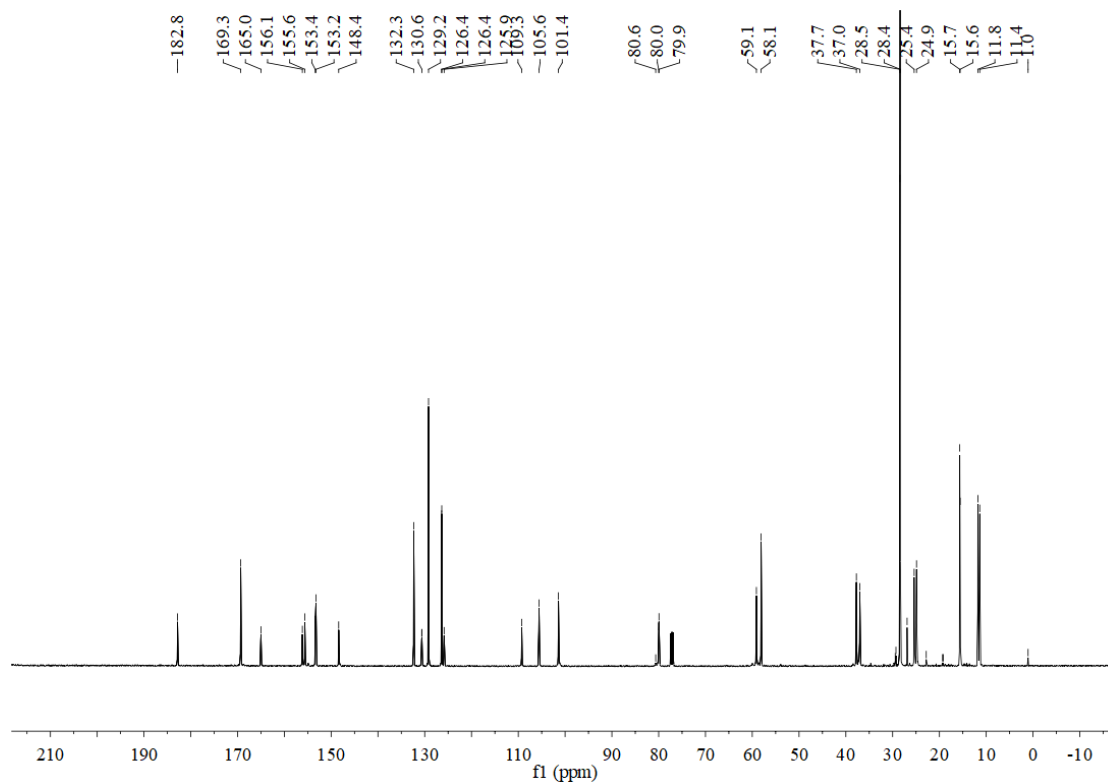

# HR-MS of Compound 7

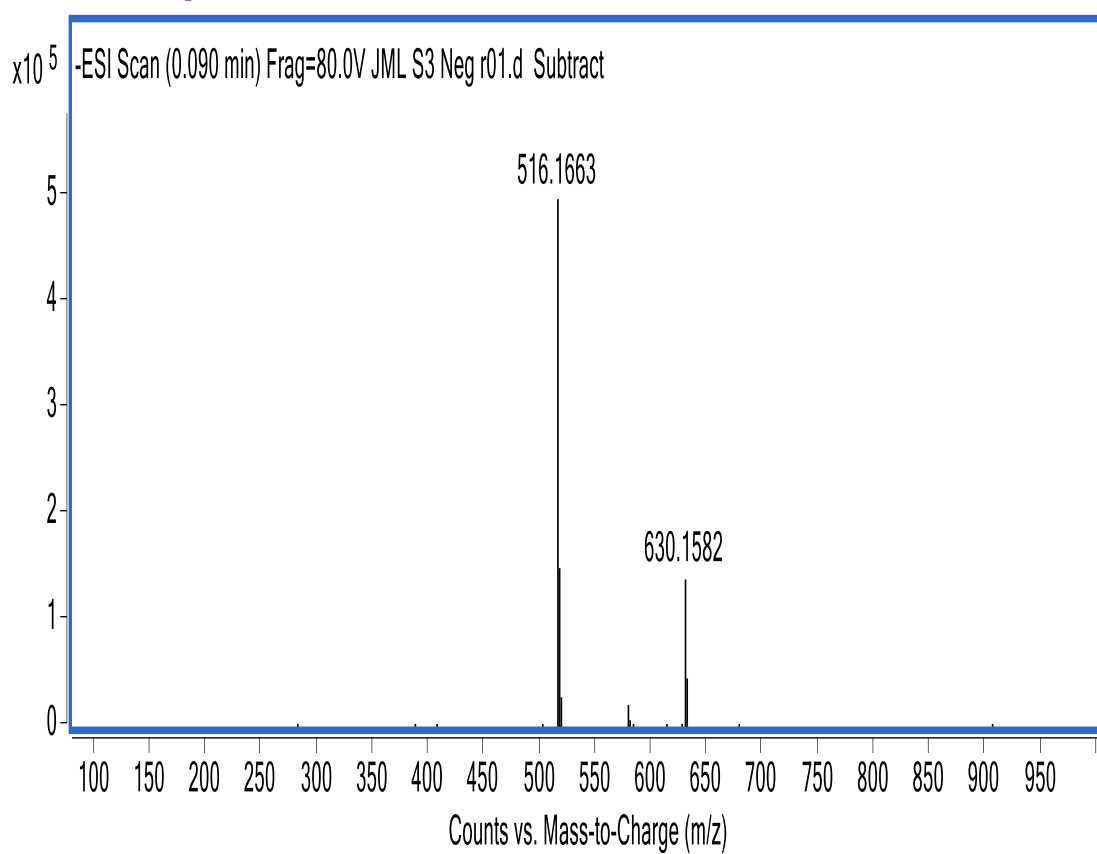

## Compound 8

<sup>1</sup>H NMR spectra of compound 8

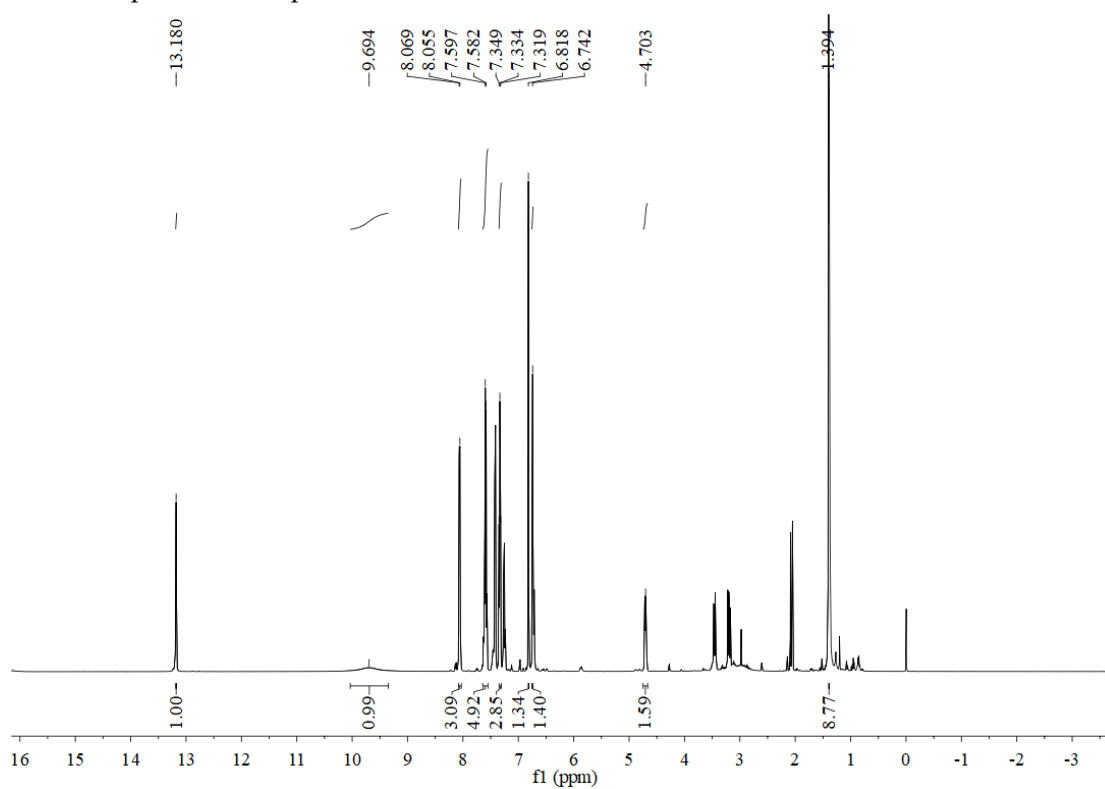

<sup>13</sup>C NMR spectra of compound **8**

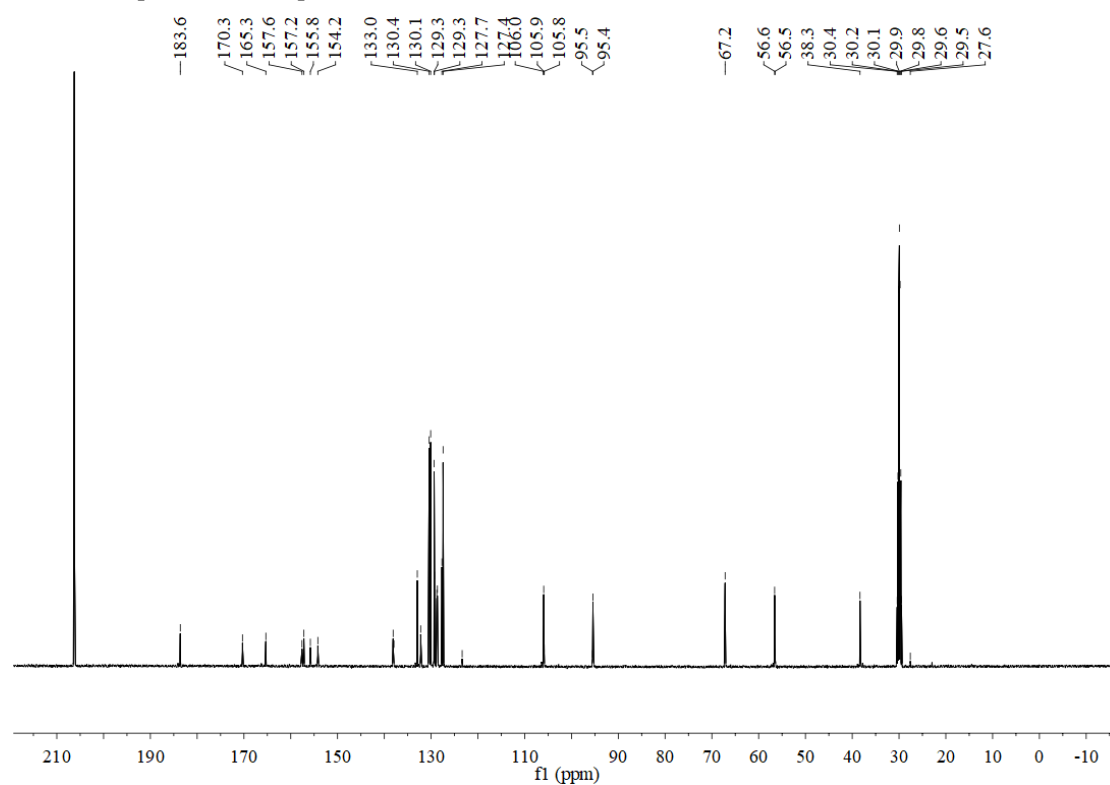

HR-MS of Compound **8**

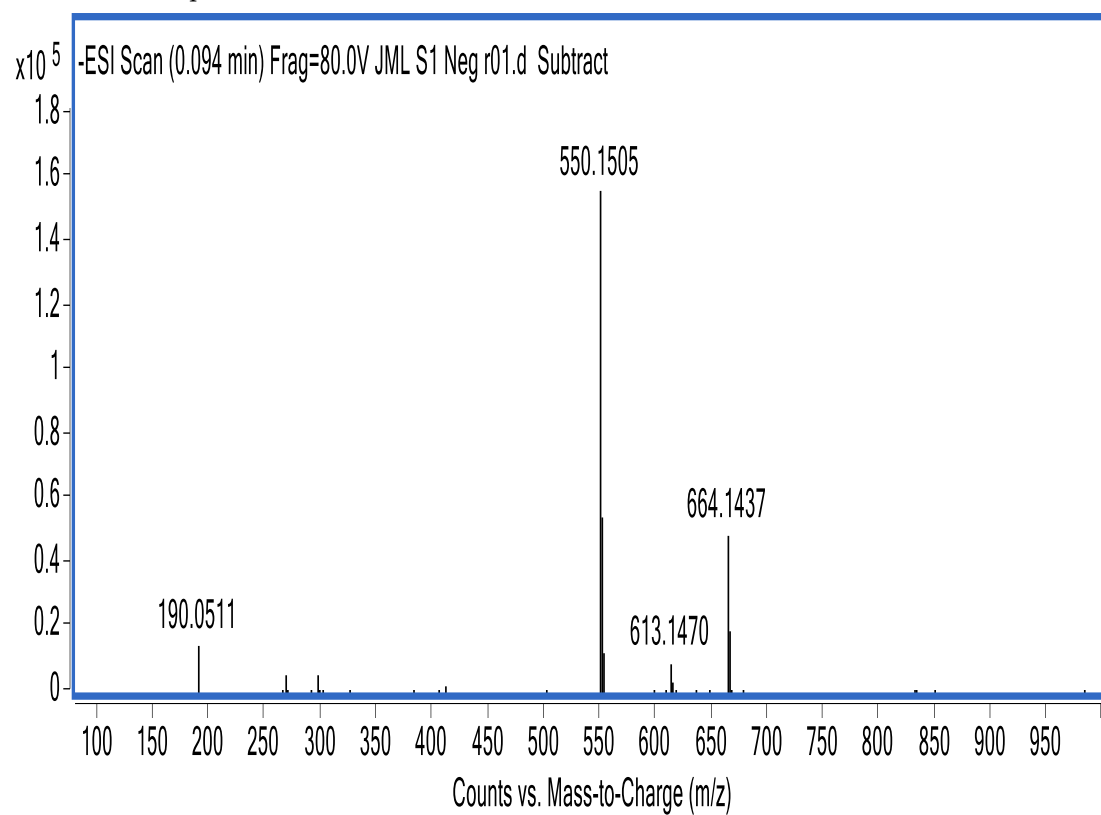

# Compound 9

$^1\text{H}$  NMR spectra of compound 9

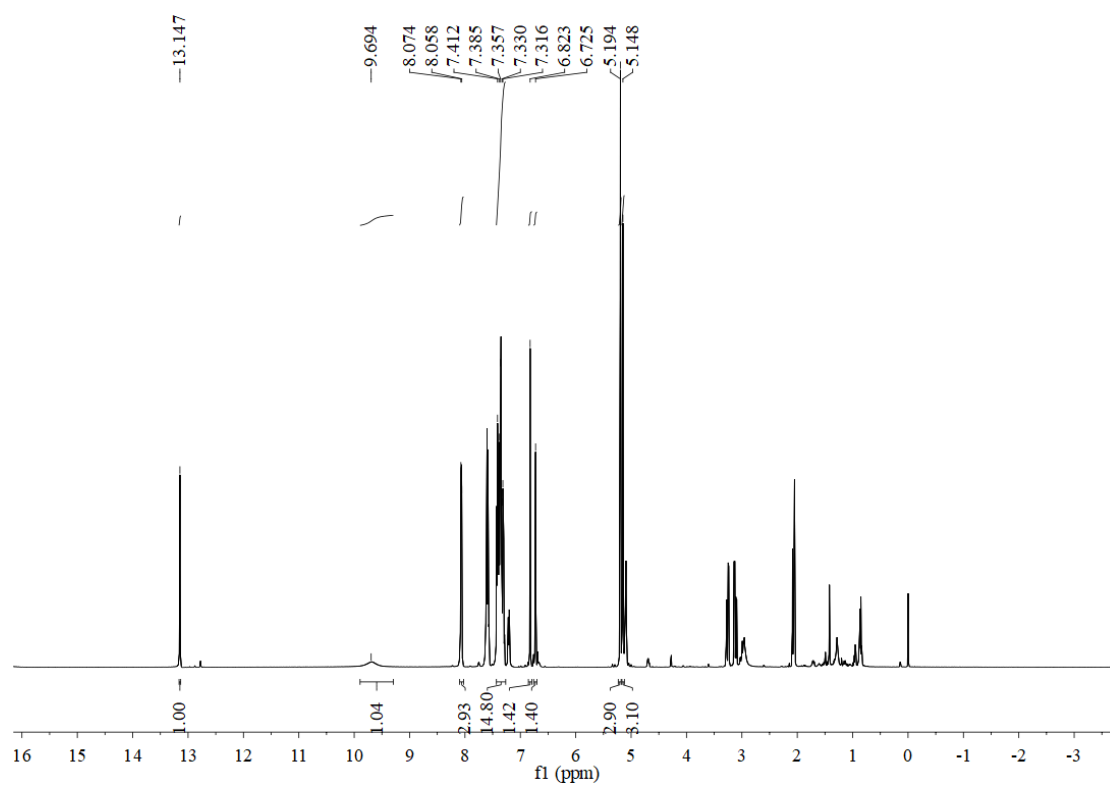

$^{13}\text{C}$  NMR spectra of compound **9**

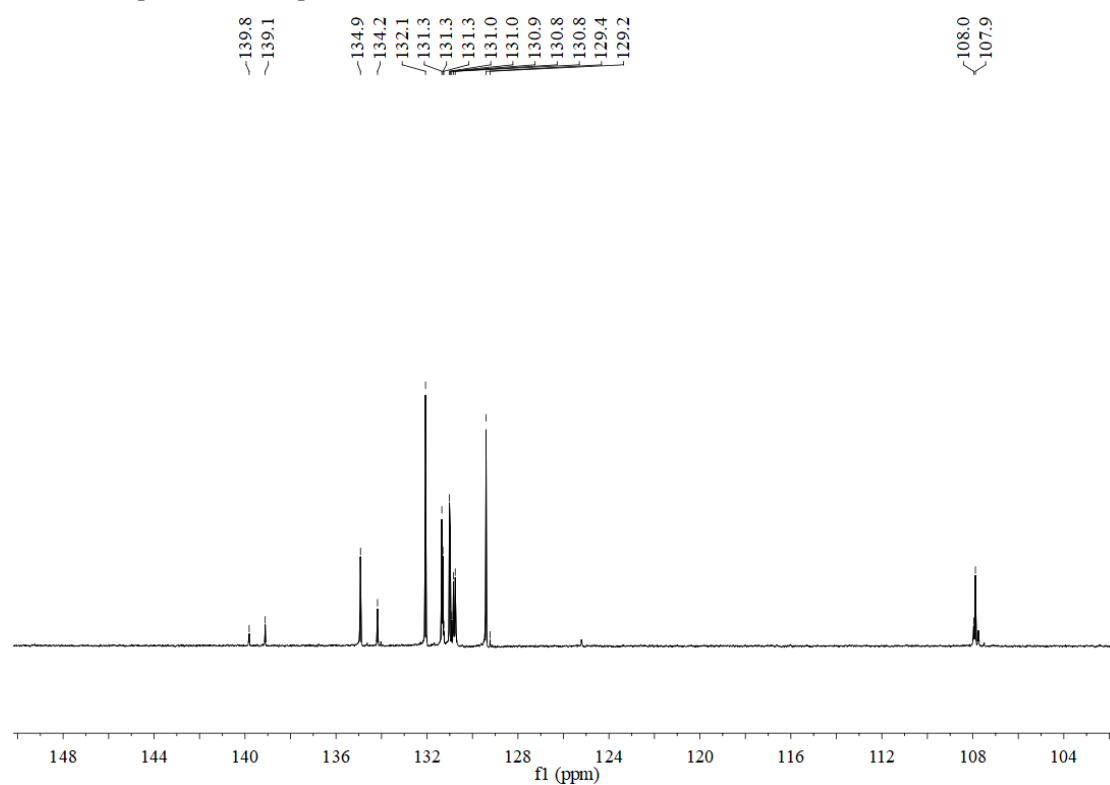

HR-MS of Compound **9**

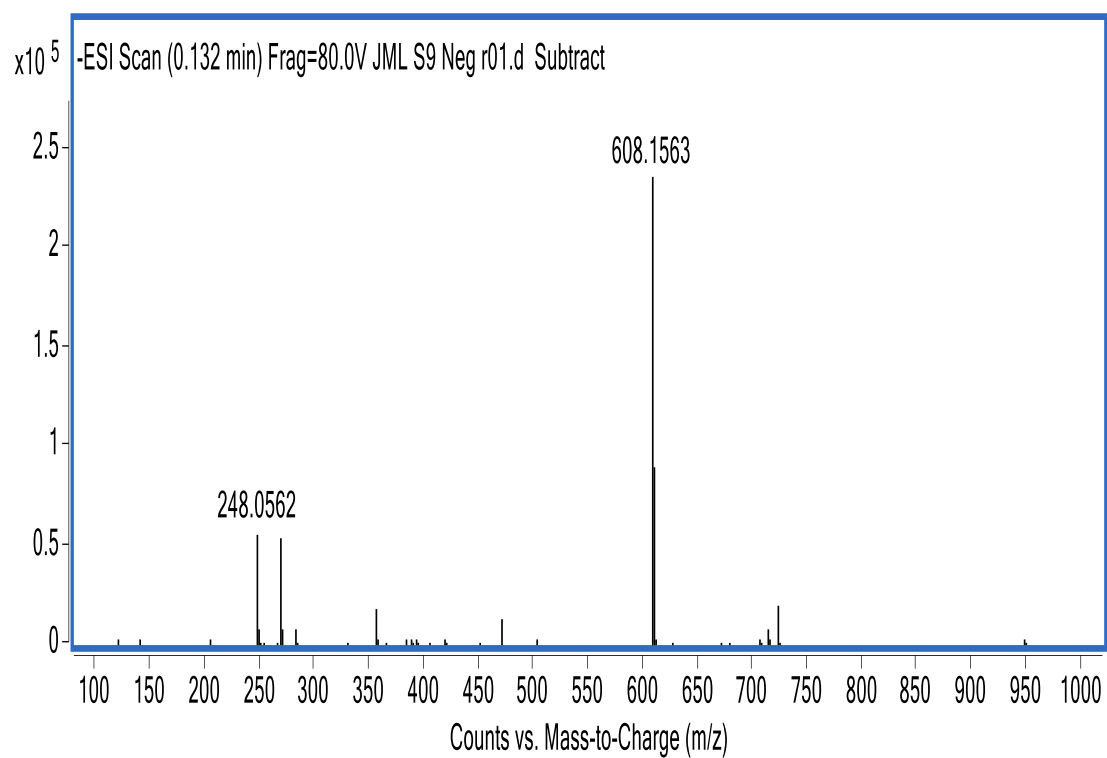



# Compound 10

## <sup>1</sup>H NMR spectra of compound 10

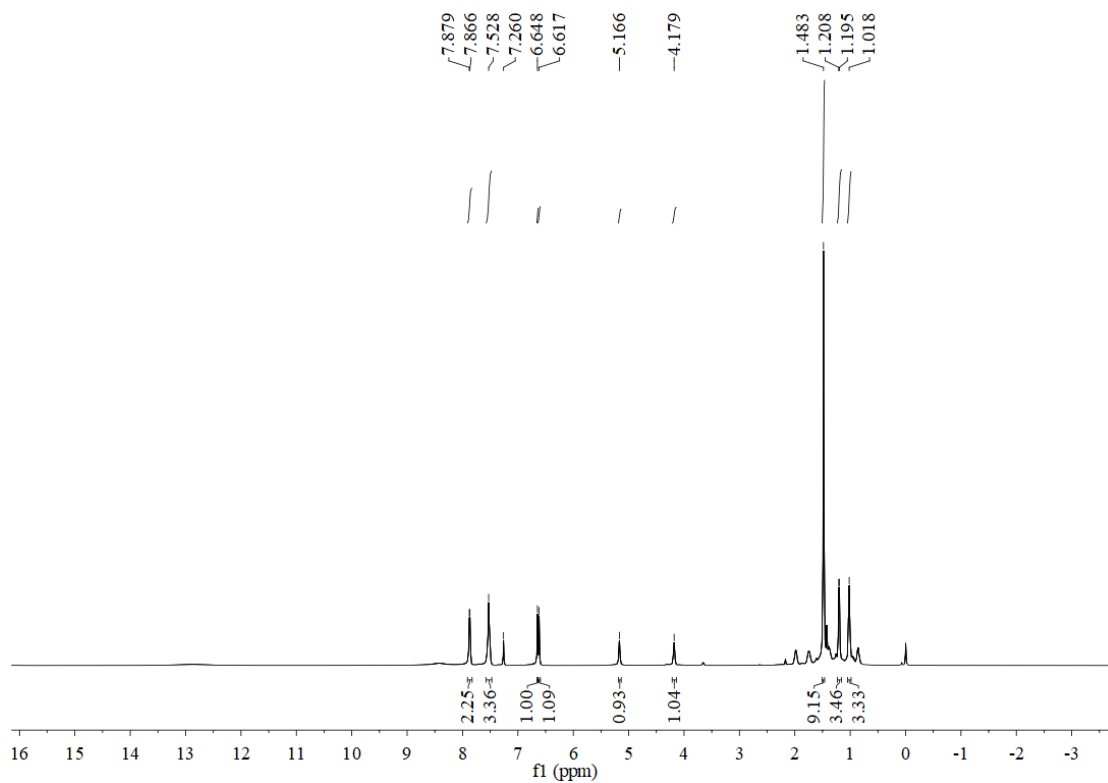

## <sup>13</sup>C NMR spectra of compound 10

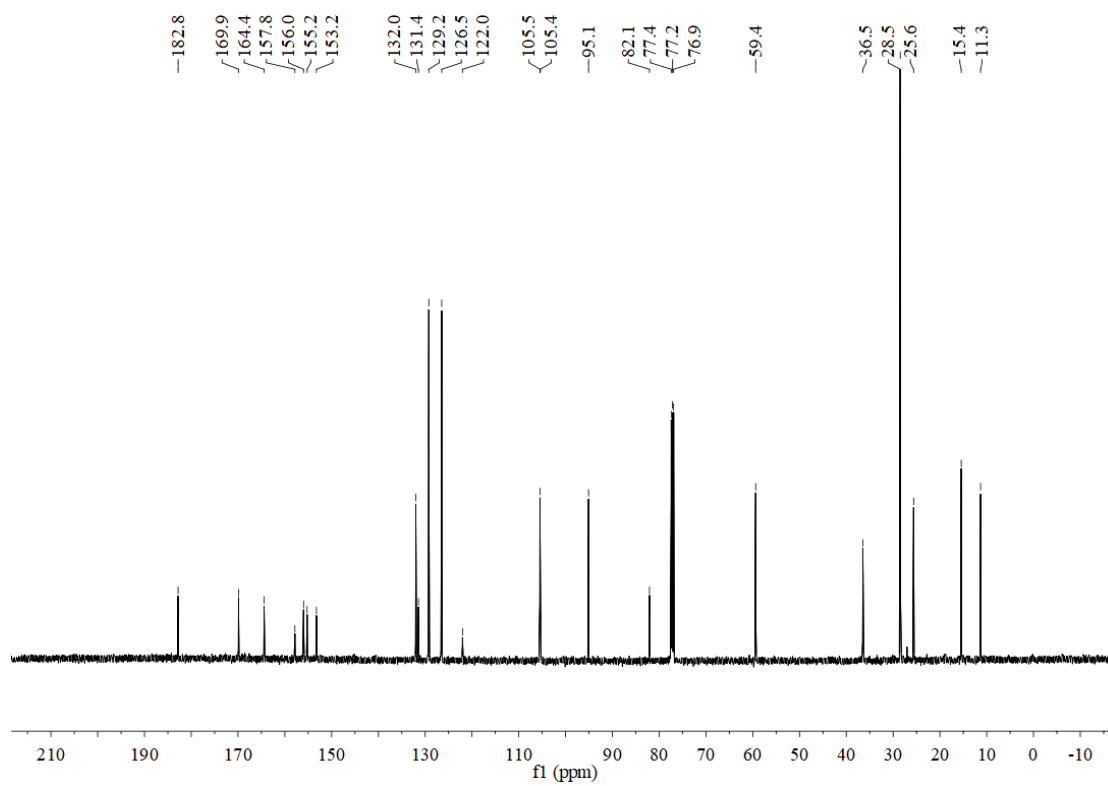

# HR-MS of Compound 10

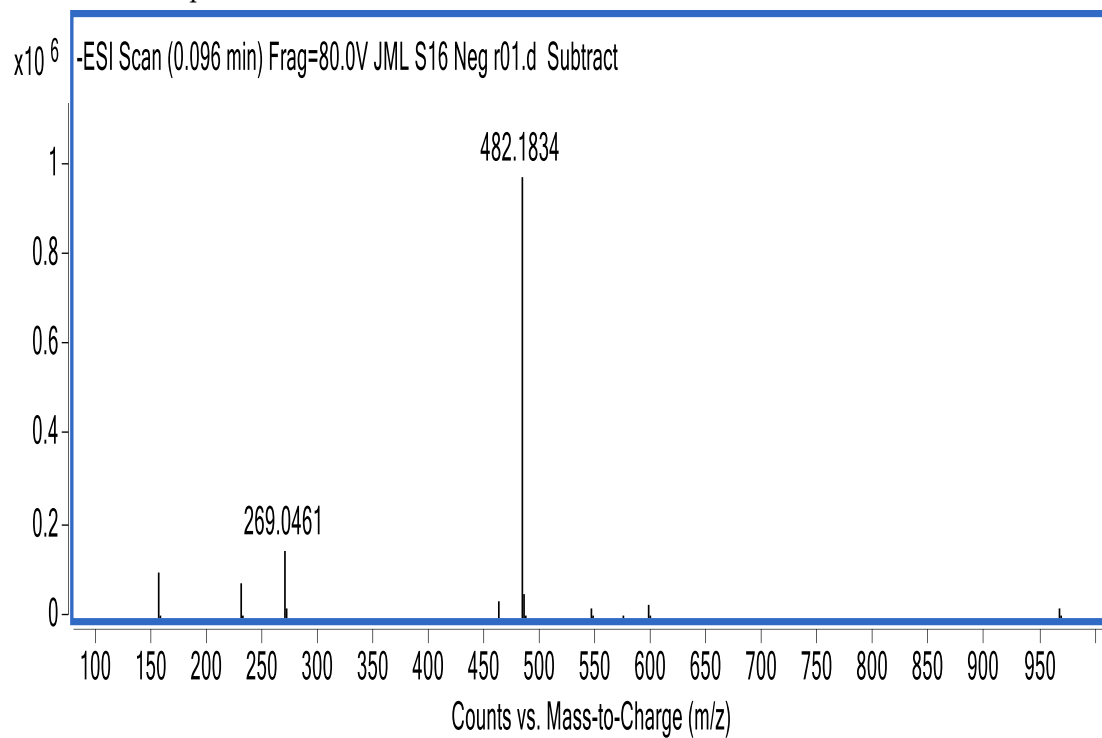

## Compound 11

<sup>1</sup>H NMR spectra of compound 11

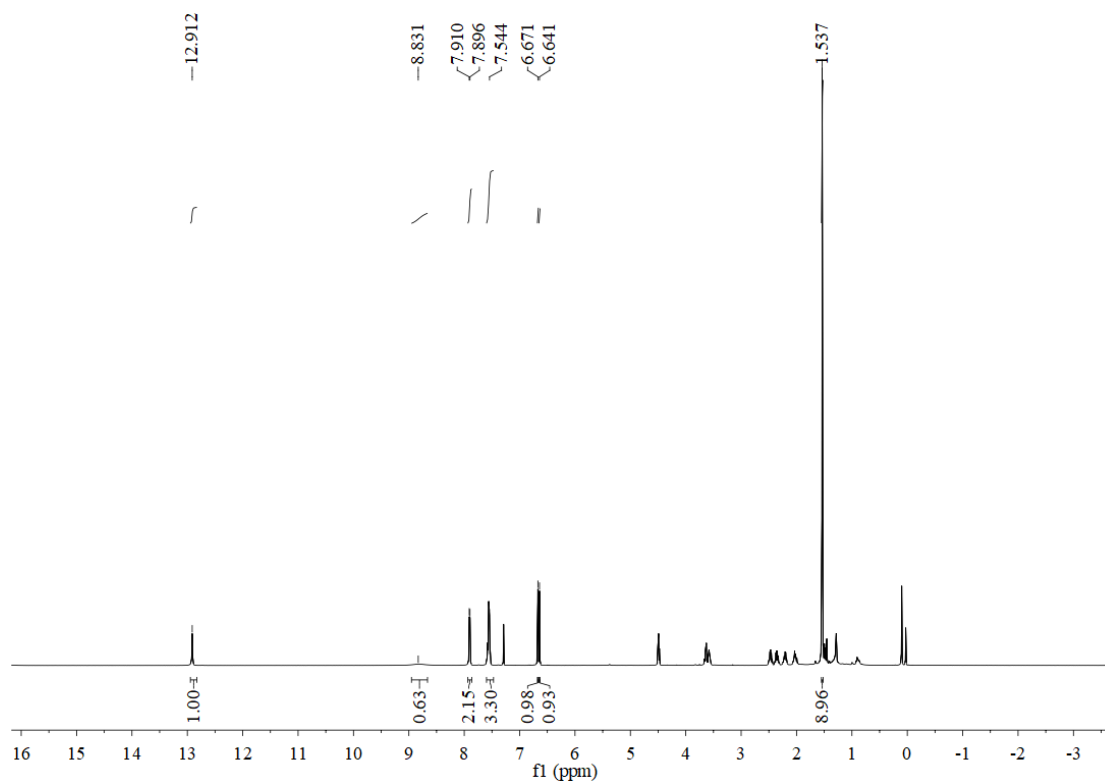

<sup>13</sup>C NMR spectra of compound **11**

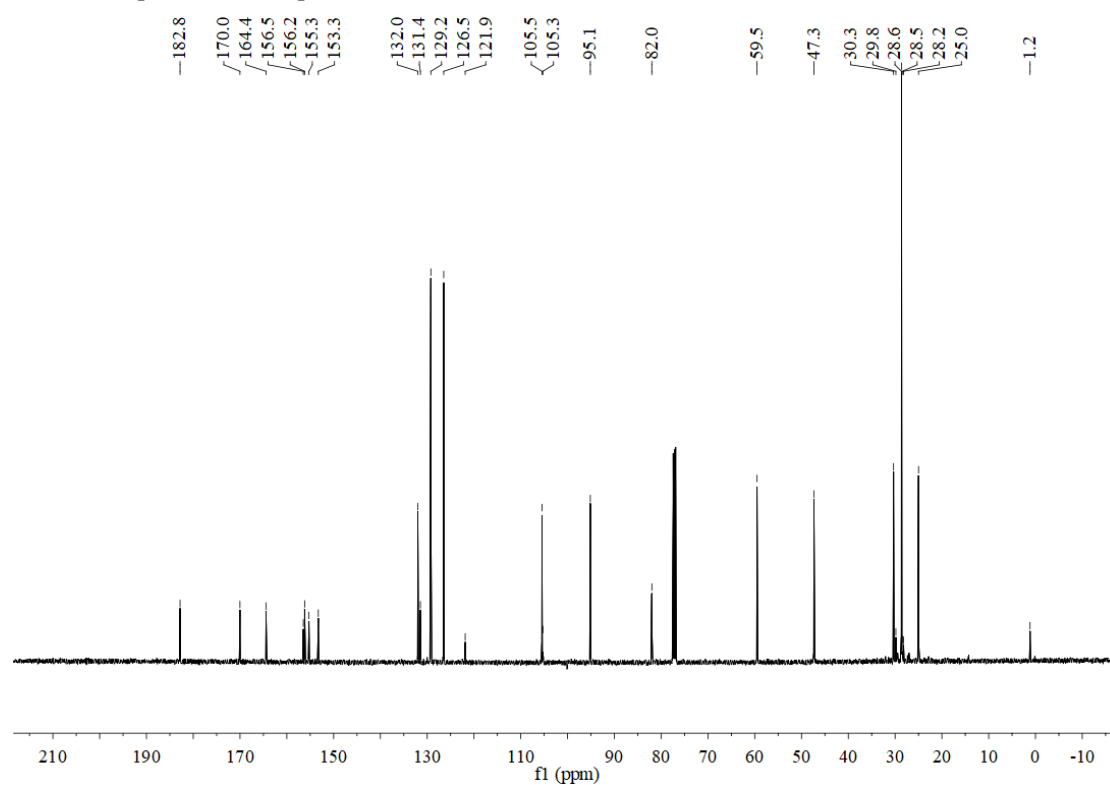

HR-MS of Compound **11**

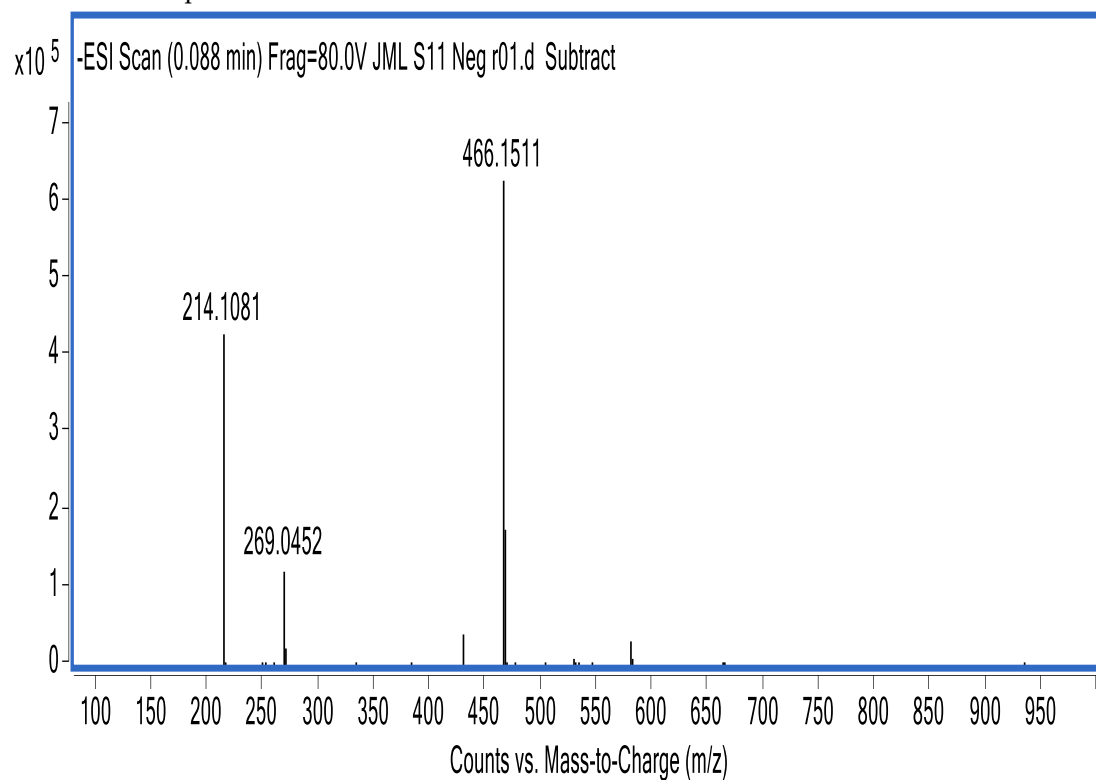

# Compound 12

## <sup>1</sup>H NMR spectra of compound 12

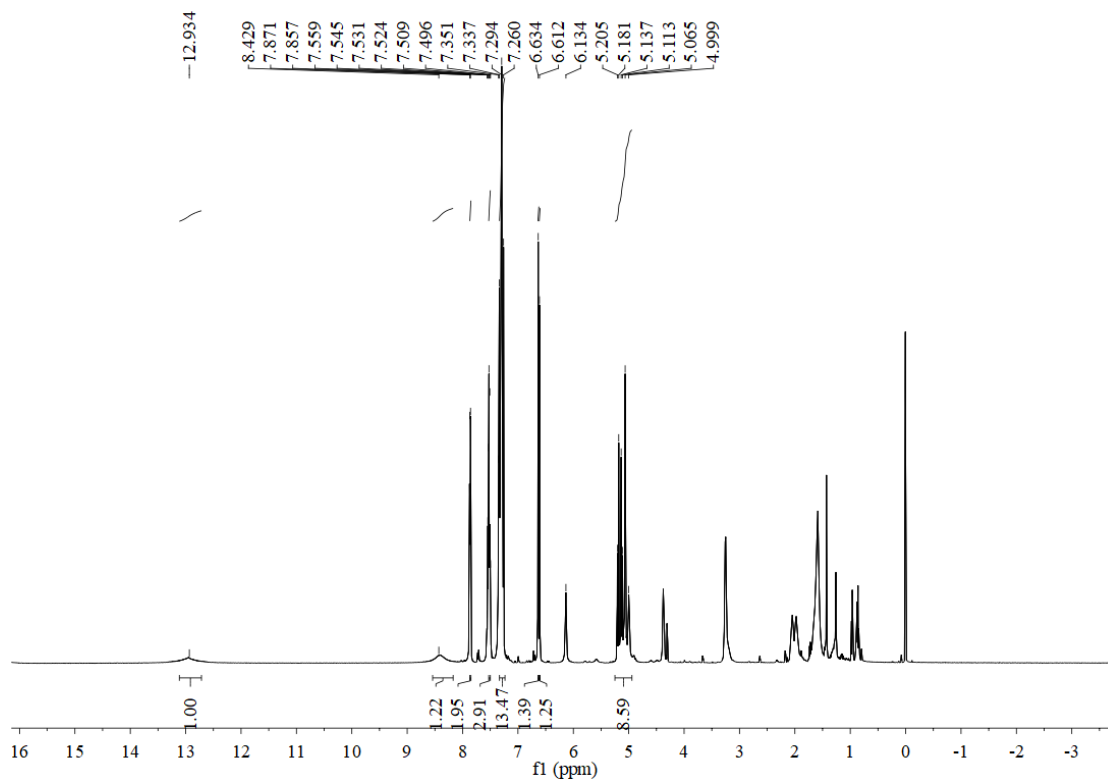

## <sup>13</sup>C NMR spectra of compound 12

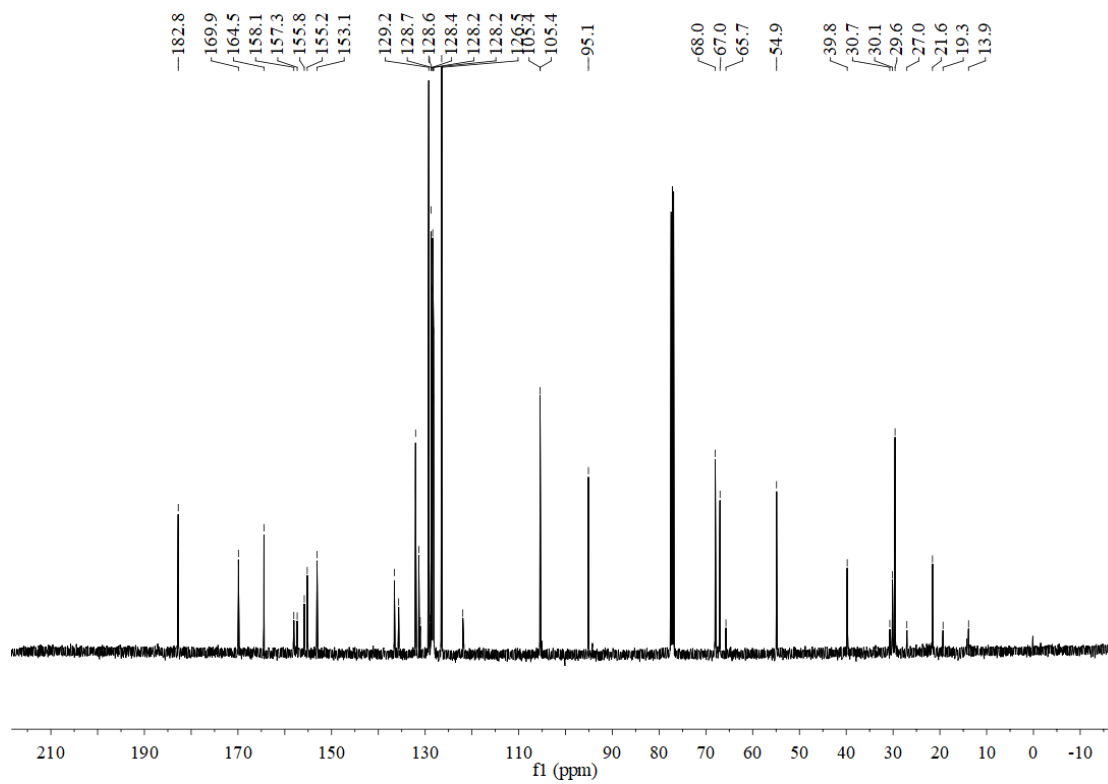

# HR-MS of Compound 12

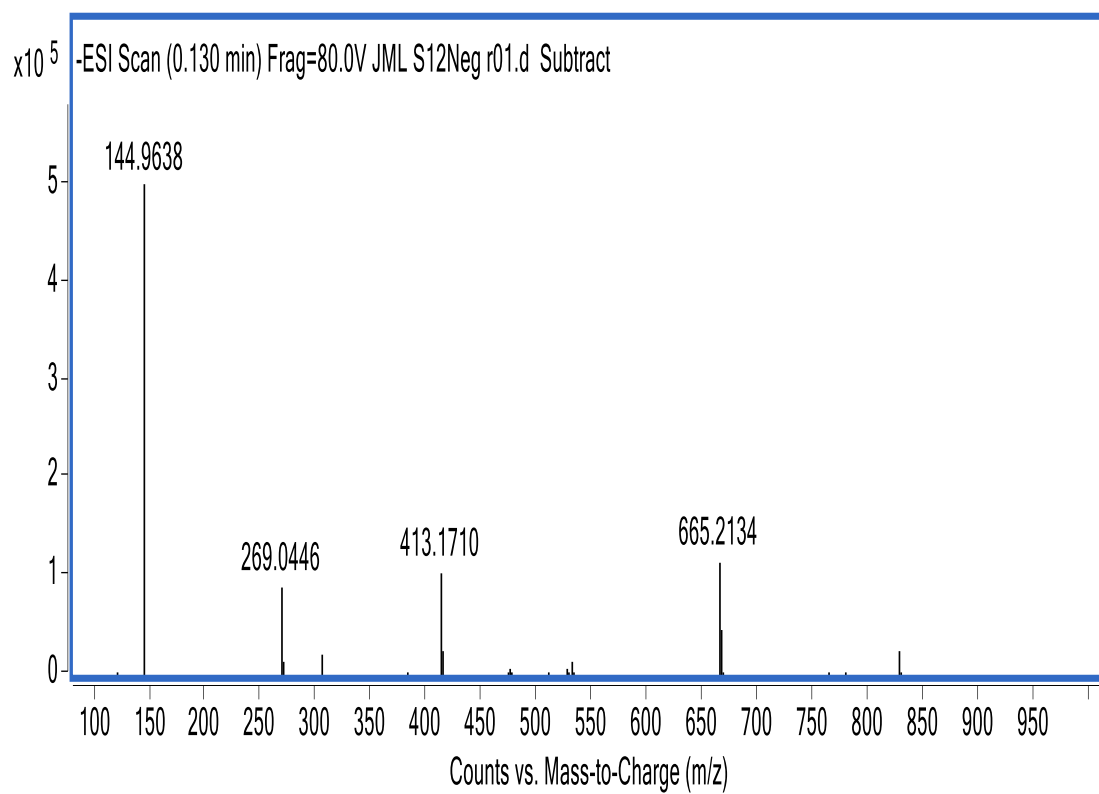

## Compound 13

<sup>1</sup>H NMR spectra of compound 13

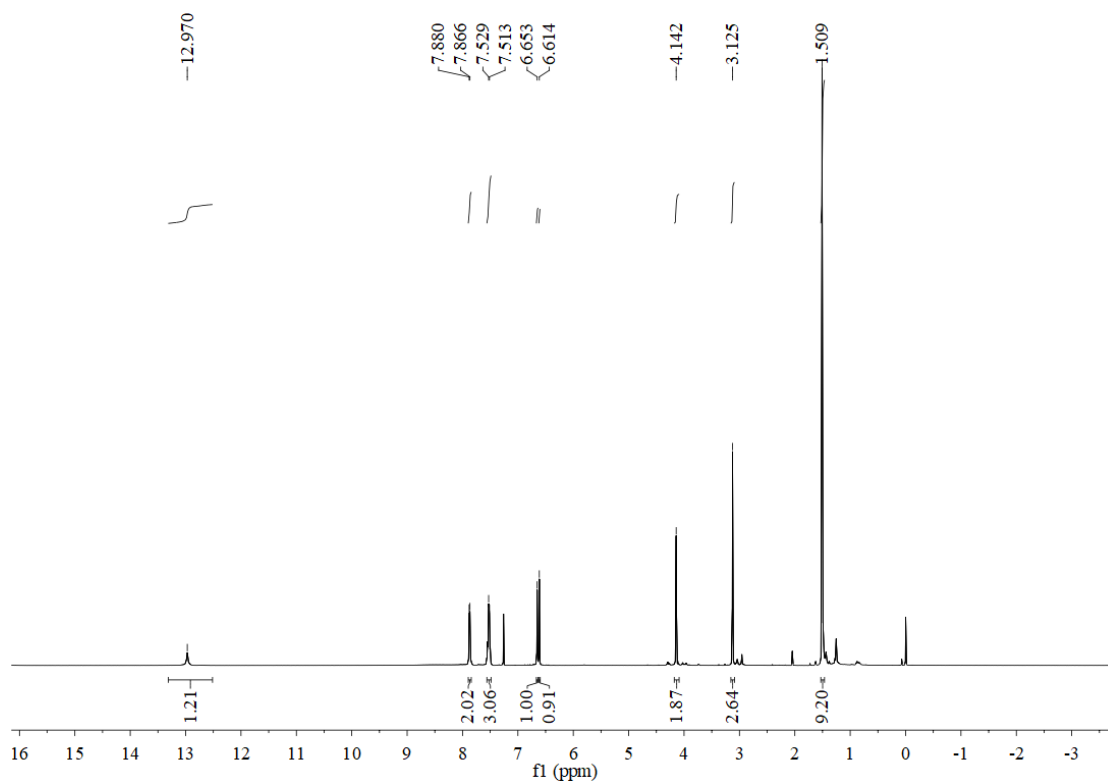

<sup>13</sup>C NMR spectra of compound **13**

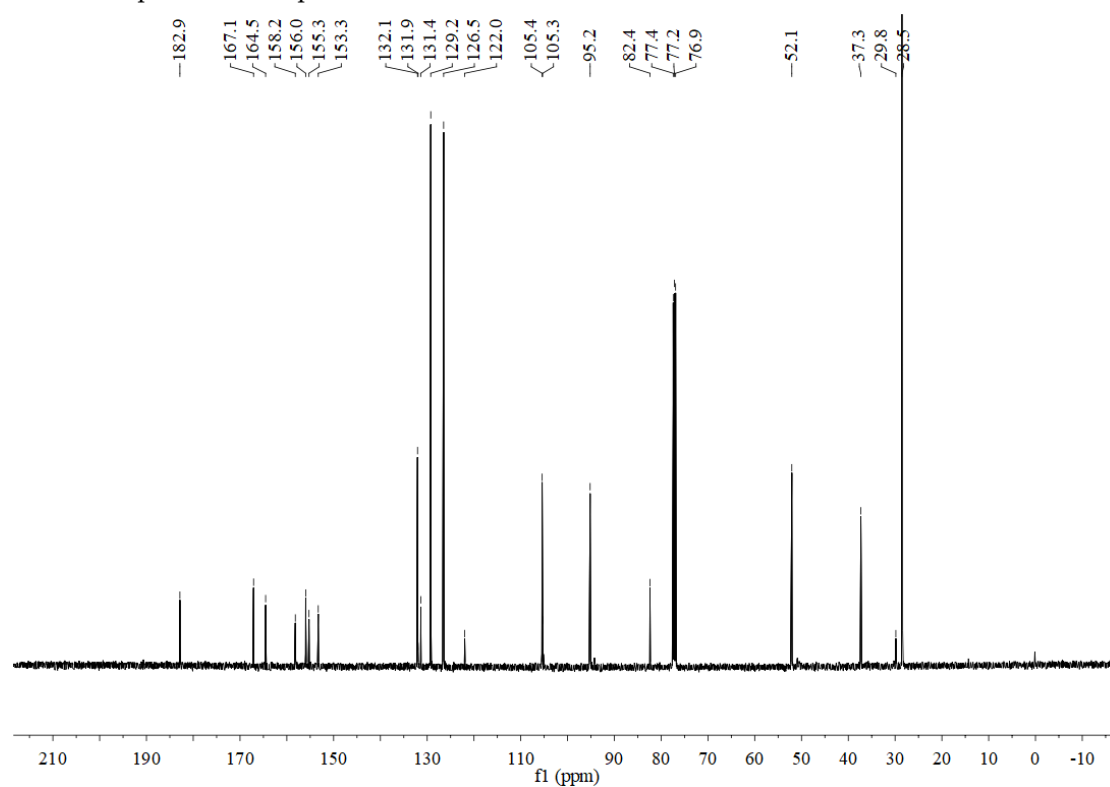

HR-MS of Compound **13**

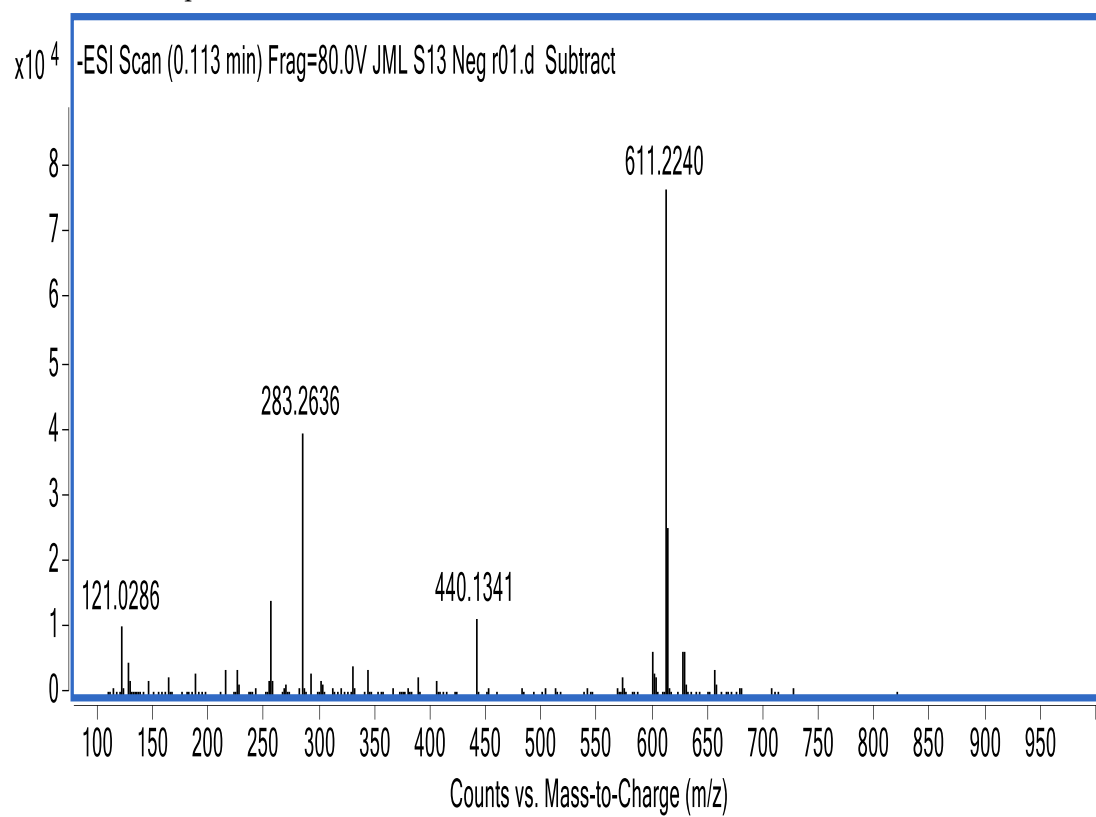

### <sup>1</sup>H NMR spectra of compound 14

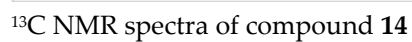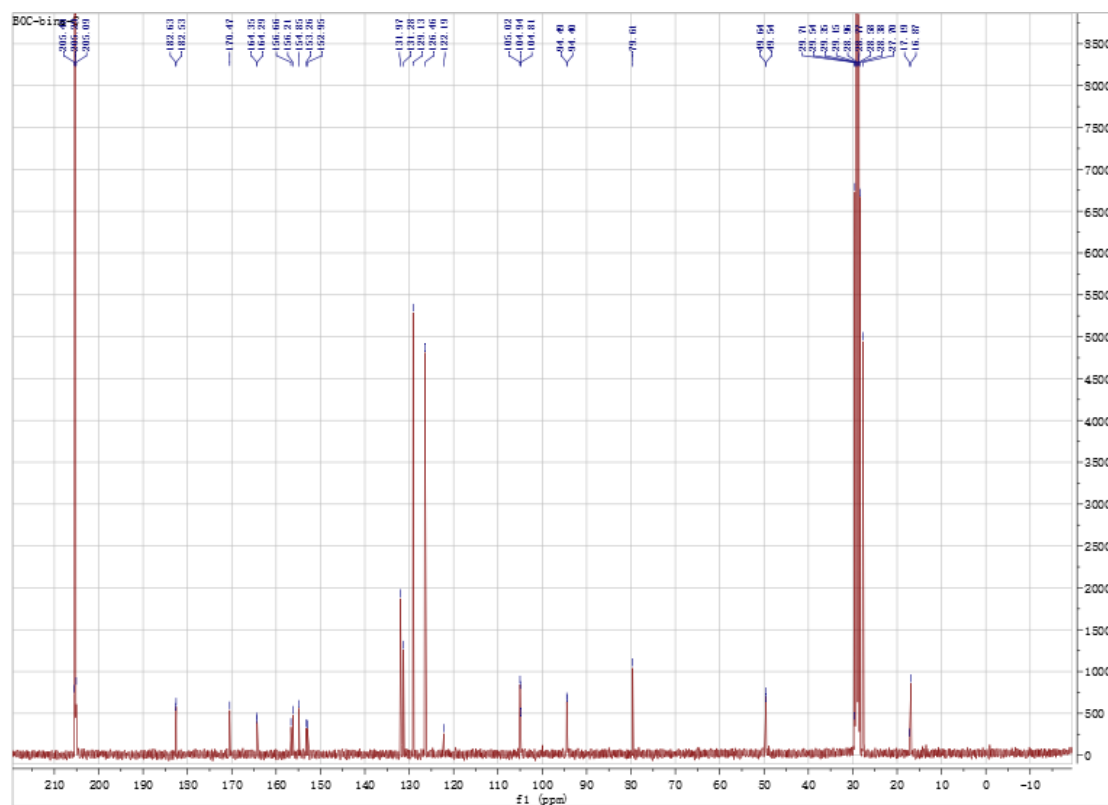

# HR-MS of Compound 14

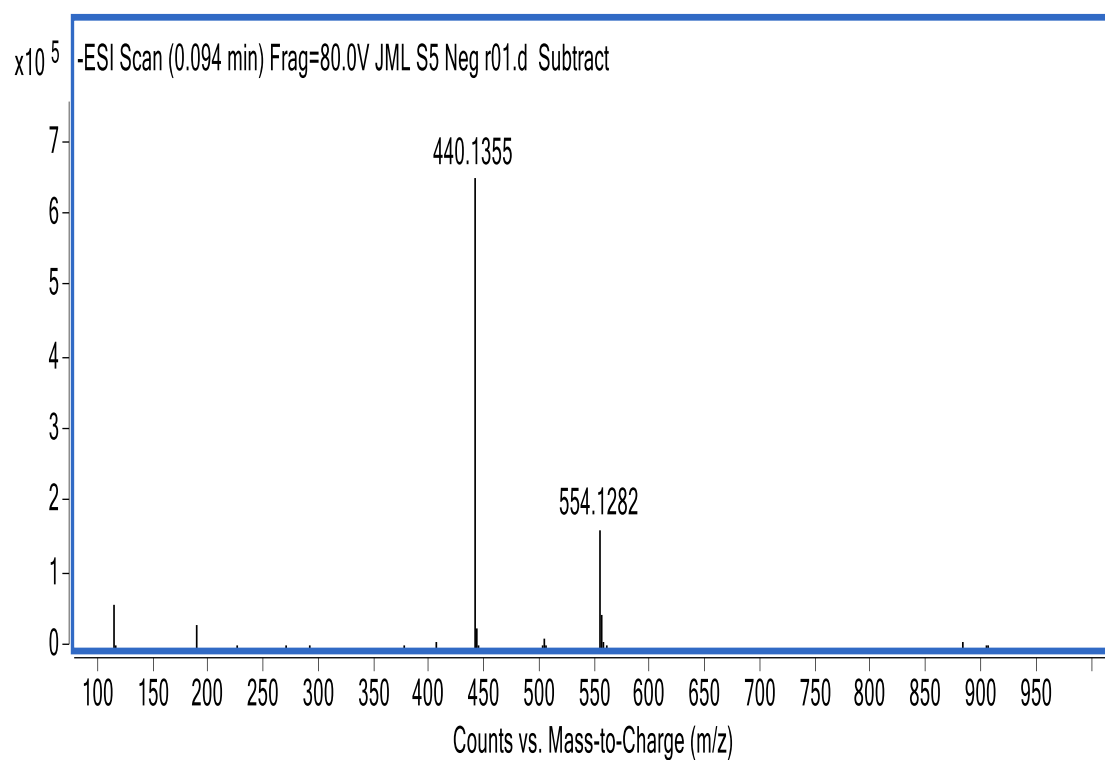

## Compound 15

<sup>1</sup>H NMR spectra of compound 15

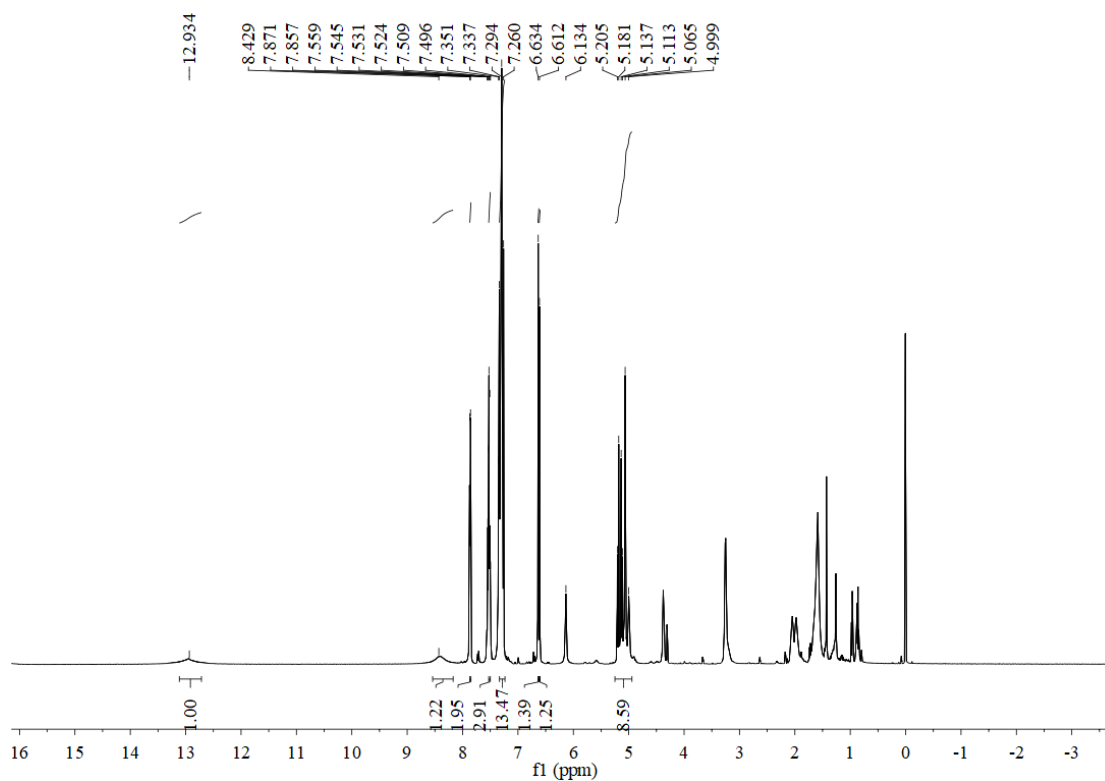



<sup>13</sup>C NMR spectra of compound **15**

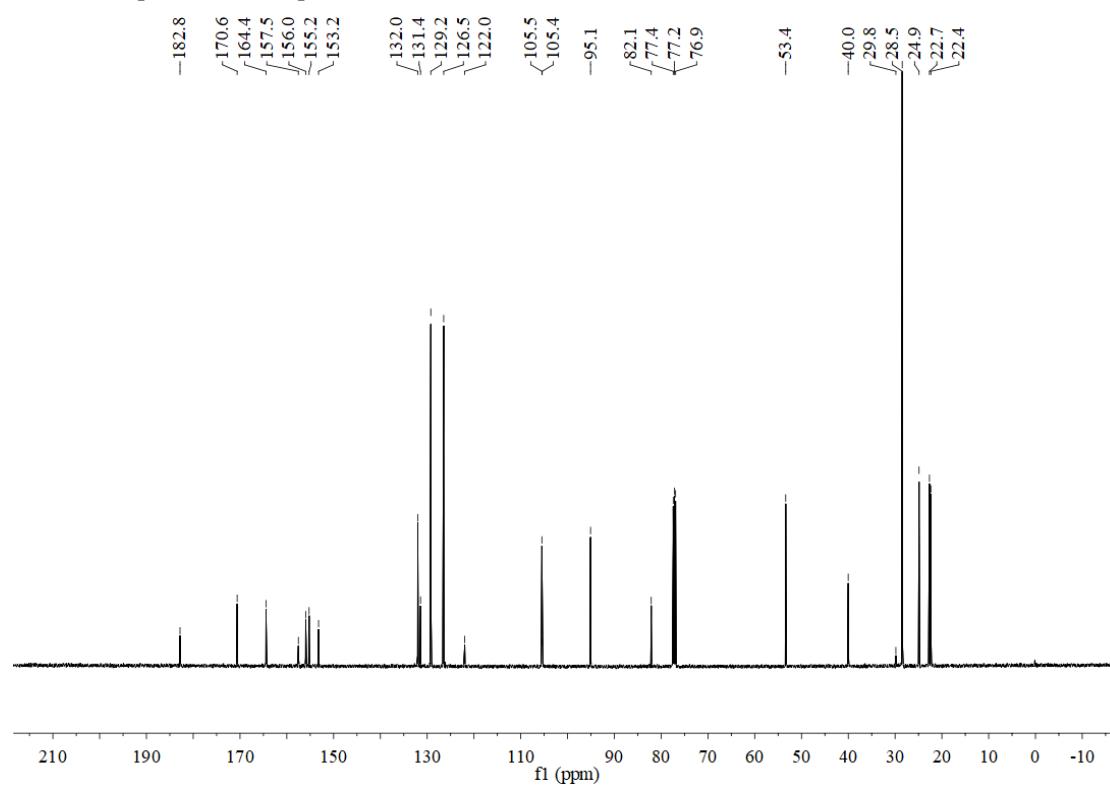

HR-MS of Compound **15**

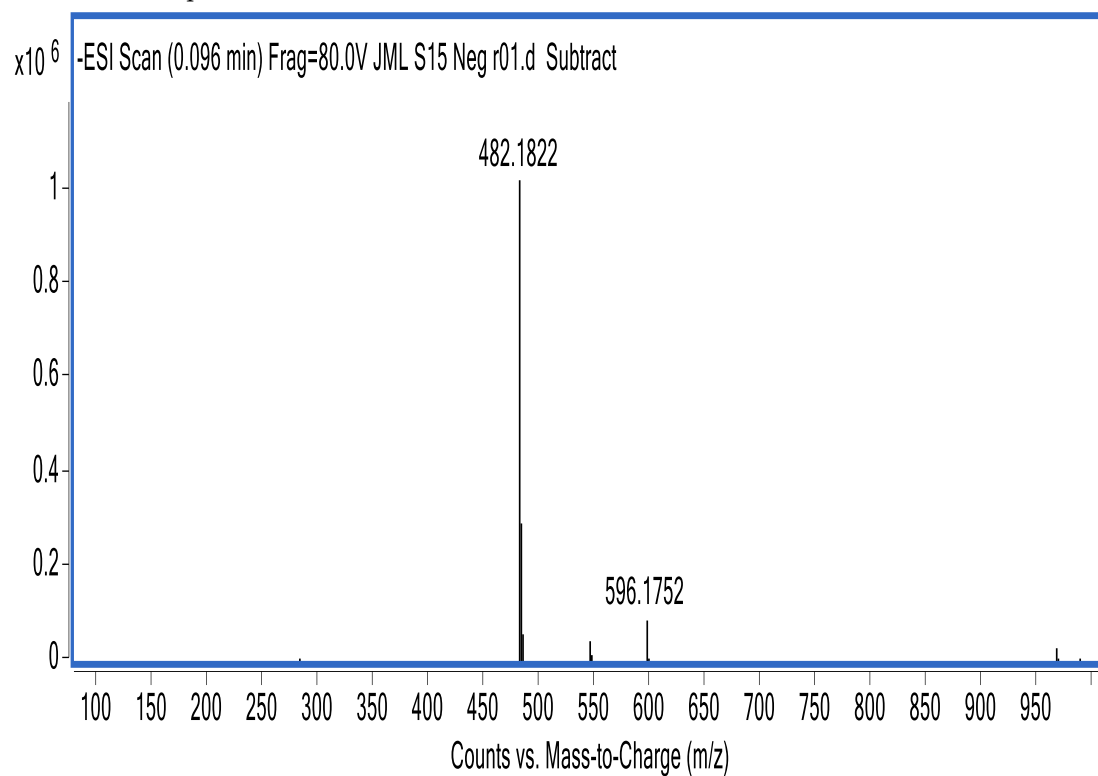

Supplement: s1 [file s1]
